# **Recurrent promoter mutations in melanoma are defined by an extended context-specific mutational signature**

Nils Johan Fredriksson<sup>1</sup>, Kerry Elliot<sup>1</sup>, Stefan Filges<sup>2</sup>, Anders Ståhlberg<sup>2</sup>, and Erik Larsson<sup>1\*</sup>

<sup>1</sup>Department of Medical Biochemistry and Cell Biology, Institute of Biomedicine, The Sahlgrenska Academy, University of Gothenburg, SE-405 30 Gothenburg, Sweden.

<sup>2</sup>Sahlgrenska Cancer Center, Department of Pathology and Genetics, Institute of Biomedicine, The Sahlgrenska Academy, University of Gothenburg, SE-405 30 Gothenburg, Sweden.

\*Correspondence to [erik.larsson@gu.se](mailto:erik.larsson@gu.se)

## **Summary**

Sequencing of whole tumor genomes holds the promise of revealing functional somatic regulatory mutations, such as those described in the *TERT* promoter. Recurrent promoter mutations have been identified in many additional genes and appear to be particularly common in melanoma, but convincing functional data such as influence on gene expression has been more elusive. Here, we show that frequently recurring promoter mutations in melanoma occur almost exclusively at cytosines flanked by a distinct sequence signature, TTCCG, with *TERT* as a notable exception. In active, but not inactive, promoters, mutation frequencies for cytosines at the 5' end of this ETS-like motif were considerably higher than expected based on a UV trinucleotide mutational signature. Additional analyses solidify this pattern as an extended context-specific mutational signature that mediates an exceptional position-specific vulnerability to UV mutagenesis, arguing against positive selection. We further use ultra-sensitive amplicon sequencing to demonstrate that cell cultures exposed to UV light quickly develop subclonal mutations specifically in affected positions. Our findings have implications for the interpretation of somatic mutations in regulatory regions, and underscore the importance of genomic context and extended sequence patterns to accurately describe mutational signatures in cancer.

## 29 Main text

30 A major challenge in cancer genomics is the separation of functional somatic driver mutations  
 31 from non-functional passengers. This problem is relevant not only in coding regions, but also  
 32 in the context of non-coding regulatory regions such as promoters, where putative driver  
 33 mutations are now mappable with relative ease using whole genome sequencing<sup>1,2</sup>. One  
 34 important indicator of driver function is recurrence across independent tumors, which can be  
 35 suggestive of positive selection. However, proper interpretation of recurrent mutations  
 36 requires a detailed understanding of how somatic mutations occur in the absence of selection  
 37 pressures. Somatic mutations are not uniformly distributed across tumor genomes, and  
 38 regional variations in mutation rates have been associated with differences in transcriptional  
 39 activity, replication timing as well as chromatin accessibility and modification<sup>3-5</sup>. Impaired  
 40 nucleotide excision repair (NER) has been shown to contribute to increased local mutation  
 41 density in promoter regions and protein binding sites<sup>6,7</sup>. Additionally, analyses of mutational  
 42 processes and their sequence signatures have shown the importance of the immediate  
 43 sequence context for local mutation rates<sup>8</sup>. Still, our understanding of mutational  
 44 heterogeneity is incomplete, and it is not clear to what extent such effects can explain  
 45 recurrent somatic mutations in promoter regions, which are suggested by some studies to be  
 46 particularly frequent in melanoma despite several other cancer types approaching melanoma  
 47 in terms of total mutation load<sup>9,10</sup>.

48 To characterize somatic promoter mutations in melanoma, we analyzed the sequence  
 49 context of recurrently mutated individual genomic positions occurring within +/- 500 bp of  
 50 annotated transcription start sites (TSSs), based on 38 melanomas subjected to whole genome  
 51 sequencing by the Cancer Genome Atlas<sup>10,11</sup>. Strikingly, of 17 highly recurrent promoter  
 52 mutations (recurring in at least 5/38 of tumors, 13%), 14 conformed to an identical 6 bp  
 53 sequence signature (**Table 1, Fig. 1a**). Importantly, the only exceptions were the previously  
 54 described *TERT* promoter mutations at chr5:1,295,228, 1,295,242 and 1,295,250<sup>12,13</sup> (**Table 1,**  
 55 **Fig. 1b**). The recurrent mutations occurred at cytosines positioned at the 5' end or one base  
 56 upstream of the motif CTTCCG (**Fig. 1c**), and were normally C>T or CC>TT transitions  
 57 (**Table 1**). Similar to most mutations in melanoma they were thus C>T changes in a  
 58 dipyrimidine context, compatible with UV-induced damage through cyclobutane pyrimidine  
 59 dimer (CPD) or 6-4 photoproduct formation<sup>8,14</sup>. Out of 15 additional positions recurrently  
 60 mutated in 4/38 tumors, 13 conformed to the same pattern, while the remaining two showed  
 61 related sequence contexts (**Table 1**). Many less recurrent sites also showed the same pattern

(**Supplementary Table 1**). The signature described here matches the consensus binding sequence of ETS family transcription factors (TFs)<sup>15</sup>, and the results are consistent with recent reports showing that ETS promoter sites are often recurrently mutated in melanoma<sup>9</sup> and that such mutations preferably occur at cytosines upstream of the core TTCC sequence<sup>16</sup>. Thus, while recurrent promoter mutations are common in melanoma, they consistently adhere to a distinct sequence signature, which may argue against positive selection as a major causative factor.

The recurrently mutated positions were next investigated in additional cancer cohorts, first by confirming them in an independent melanoma dataset<sup>17</sup> (**Supplementary Table 2**). We found that the identified hotspot positions were often mutated also in cutaneous squamous cell carcinoma (cSCC)<sup>18</sup> (**Supplementary Table 3**) as well as in sun-exposed skin<sup>18,19</sup>, albeit at lower variant frequencies (**Supplementary Fig. 1, Supplementary Table 4**). Additionally, one of the mutations, upstream of *DPH3*, was recently described as highly recurrent in basal cell skin carcinoma<sup>20</sup>. However, we did not detect mutations in these positions in 13 non-UV-exposed cancer types (**Supplementary Table 5**). The hotspots are thus present in UV-exposed samples of diverse cellular origins, but in contrast to the *TERT* promoter mutations they are completely absent in non-UV-exposed cancers. This further supports that recurrent mutations at the 5' end of CTTCCG elements are due to elevated susceptibility to UV-induced mutagenesis in these positions.

Next, we considered additional properties that could support or argue against a functional role for the recurrent mutations. We first noted a general lack of known cancer-related genes among the affected promoters, with *TERT* as one of few exceptions (**Table 1** and **Supplementary Table 1**, indicated in blue). Secondly, the recurrent promoter mutations were not associated with differential expression of the nearby genes (**Table 1** and **Supplementary Table 1**). This is in agreement with earlier investigations of some of these mutations, which gave no conclusive evidence regarding influence on gene expression<sup>9,16,20</sup>, although it should be noted that significant association is lacking also for *TERT* in this relatively small cohort<sup>10</sup>. Lastly, we found that when comparing different tumors there was a strong positive correlation between the total number of the established hotspot positions that were mutated and the genome-wide mutation load, both in melanoma (**Fig. 2a**; Spearman's  $r = 0.88$ ,  $P = 2.8\text{e-}13$ ) and in cSCC (**Supplementary Table 3**;  $r = 0.78$ ,  $P = 0.026$ ). This is again compatible with a passive model involving elevated mutation probability in the affected positions. Importantly, this contrasted sharply with most of the major driver mutations in

melanoma, which were detected also in tumors with lower mutation load (**Fig. 2b**, **Supplementary Table 3**). These different findings further reinforce the CTTCCG motif as a strong mutational signature in melanoma.

We next investigated whether the observed signature would be relevant also outside of promoter regions. As expected, numerous mutations occurred in CTTCCG sequences across the genome, but notably we found that recurrent mutations involving this motif were always located close to actively transcribed TSSs (**Fig. 3abc**). We further compared the frequencies of mutations occurring at cytosines in the context of the motif to all possible trinucleotide contexts, an established way of describing mutational signatures in cancer<sup>8</sup>. As expected, on a genome-wide scale, the mutation probability for cytosines in CTTCCG-related contexts was only marginally higher compared to corresponding trinucleotide contexts (**Fig. 4a**). However, close to TSSs, the signature conferred a striking elevation in mutation probability compared to related trinucleotides, in particular for cytosines at the 5' end of the motif and most notably near highly expressed genes (**Fig. 4b-d**). Recurrent promoter mutations in melanoma thus conform to a distinct sequence signature manifested only in the context active promoters, suggesting that a specific binding partner is required for the element to confer elevated mutation probability.

CTTCCG elements have in various individual promoters been shown to be bound by ETS factors such as ETS1, GABPA and ELF1<sup>21</sup>, ELK4<sup>22</sup>, and E4TF1<sup>23</sup>. This suggests that the recurrently mutated CTTCCG elements could be substrates for ETS TFs. As expected, matches to CTTCCG in the JASPAR database of TF binding motifs were mainly ETS-related (**Supplementary Table 6**). Notably, recurrently mutated CTTCCG sites were evolutionarily conserved to a larger degree than non-recurrently mutated but otherwise similar control sites, further supporting that they constitute functional ETS binding sites (**Supplementary Fig. 2**). This was corroborated by analysis of top recurrent CTTCCG sites in relation to ENCODE ChIP-seq data for 161 TFs, which showed that the strongest and most consistent signals were for ETS factors (GABPA and ELF1) (**Supplementary Fig. 3**).

The distribution of mutations across tumor genomes is shaped both by mutagenic and DNA repair processes. Binding of TFs to DNA can increase local mutation rates by impairing NER, and strong increases have been observed in predicted sites for several ETS factors<sup>6,7</sup>. It is also established that contacts between DNA and proteins can modulate DNA damage patterns by altering conditions for UV photoproduct formation<sup>24-27</sup>. In upstream regions of XPC -/- cSCC tumors lacking global NER, we found that the CTTCCG signature still

conferred strongly elevated mutation probabilities compared to relevant trinucleotide contexts (**Supplementary Fig. 4**), although to a lesser extent than in melanomas with functional NER (**Fig. 4**). Transcription-coupled NER (TC-NER) may still be active in XPC <sup>-/-</sup> tumors, and the signature could thus theoretically arise due to inhibition of TC-NER at CTTCCG elements. However, the recurrently mutated positions were typically positioned upstream of the TSSs (**Fig. 1**) and should not be subjected to this process. Additionally, TC-NER is strand-specific<sup>14</sup> while the mutations occurred independently of strand orientation relative to the downstream gene (**Supplementary Fig. 4**). The signature described here is thus unlikely explained by impaired NER alone and may instead arise due to inhibition of other repair processes or due to favorable conditions for UV lesion formation at the 5' end of ETS-bound CTTCCG elements.

Finally, we sought to experimentally test our proposed model that the observed promoter hotspots are due to localized vulnerability to mutagenesis by UV light. We subjected human melanoma cells and keratinocytes to daily UV doses for a period of 5 or 10 weeks (**Fig. 5a**) and used an ultrasensitive error-correcting amplicon sequencing protocol, SiMSen-Seq<sup>28</sup>, to assay two of the observed promoter hotspots for mutations: *RPL13A*, the most frequently mutated site in the tumor data (**Table 1**), and *DPH3*<sup>10,20</sup>. Between 36k and 82k error-corrected reads (>20x oversampling) were obtained for each of 16 different conditions (**Fig. 5b-c**). Strikingly, subclonal mutations appeared specifically in expected positions at both time points and in both cell lines at a frequency reaching up to 2.9% of fragments (*RPL13A*, 10 weeks of exposure), while being absent in non-exposed control cells (**Fig. 5d-e**). As predicted by the tumor data, mutations occurred primarily at cytosines upstream of the TTCCG motif, with lower-frequency mutations occurring also in the central cytosines. Few mutations were observed outside of the TTCCG context despite presence of many cytosines in theoretically vulnerable configurations in the two amplicons (**Fig. 5d-e**, underscored). These results further reinforce that recurrent mutation hotspots in promoters in melanoma arise due to an exceptional vulnerability to UV mutagenesis in these positions.

In summary, we demonstrate that recurrent promoter mutations are common in melanoma, but also that they adhere to a distinct sequence signature in a strikingly consistent manner, arguing against positive selection as a major driving force. This model is supported by several additional observations, including lack of cancer-relevant genes, lack of obvious effects on gene expression, presence of the signature exclusively in UV-exposed samples of diverse cellular origins, and strong positive correlation between genome-wide mutation load

and mutations in the affected positions. Crucially, exposing cells to UV light under controlled conditions efficiently induces mutations specifically in affected sites. These results point to limitations in conventional genome-wide derived trinucleotide models of mutational signatures, and imply that extended sequence patterns as well as genomic context should be taken into account to improve interpretation of somatic mutations in regulatory DNA.

## Methods

### Mapping of somatic mutations

Whole-genome sequencing data for 38 skin cutaneous melanoma (SKCM) metastases was obtained from the Cancer Genome Atlas (TCGA) together with matching RNA-seq data. Mutations were called using samtools<sup>29</sup> (command *mpileup* with default settings and additional options *-q1* and *-B*) and VarScan<sup>30</sup> (command *somatic* using the default minimum variant frequency of 0.20, minimum normal coverage of 8 reads, minimum tumor coverage of 6 reads and the additional option *-strand-filter 1*). Mutations where the variant base was detected in the matching normal were not considered for analysis. The resulting set of mutations was further processed by removing mutations overlapping germline variants included in the NCBI dbSNP database, Build 146. The genomic annotation used was GENCODE<sup>31</sup> release 17, mapped to GRCh37. The TSS of a gene was defined as the 5' most annotated transcription start. Somatic mutation status for known driver genes was obtained from the cBioPortal<sup>32,33</sup>.

### RNA-seq data processing

RNA-seq data was analyzed with respect to the GENCODE<sup>31</sup> (v17) annotation using HTSeq-count (<http://www.huber.embl.de/users/anders/HTSeq>) as previously described<sup>34</sup>. Differential gene expression between tumors with and without mutations in promoter regions was evaluated using the two-sided Wilcoxon rank sum test, avoiding assumptions about distribution or directionality.

### Analyzed genomic regions

The SKCM tumors were analyzed across the whole genome or in regions close to TSS, in which case only mutations less than 500 bp upstream or downstream of TSS were included. For the analysis of regions close to TSS the genes were divided in three tiers of equal size based on the mean gene expression level across the 38 SKCM tumors.



## **Mutation probability calculation**

The February 2009 assembly of the human genome (hg19/GRCh37) was downloaded from the UCSC Genome Bioinformatics site. Sequence motif and trinucleotide frequencies were obtained using the tool *fuzznuc* included in the software suite EMBOSS<sup>35</sup>. The mutation probability was calculated as the total number of observed mutations in a given sequence context across all tumors divided by the number of instances of this sequence multiplied by the number of tumors.

## **Evolutionary conservation data**

The evolutionary conservation of genome regions was evaluated using phastCons scores<sup>36</sup> from multiple alignments of 100 vertebrate species retrieved from the UCSC genome browser. The analyzed regions were 30 bases upstream and downstream of the motif CTTCCG located less than 500 bp from TSS.

## **ChIP-seq data**

Binding of transcription factors at NCTTCCGN sites was evaluated using normalized scores for ChIP-seq peaks from 161 transcription factors in 91 cell types (ENCODE track wgEncodeRegTfbsClusteredV3) obtained from the UCSC genome browser.

## **Analysis of whole genome sequencing data from UV-exposed skin**

Whole genome sequencing data from sun-exposed skin, eye-lid epidermis, was obtained from Martincorena *et al.*, 2015<sup>19</sup>. Samtools<sup>29</sup> (command *mpileup* with a minimum mapping quality of 60, a minimum base quality of 30 and additional option *-B*) was used to process the data and VarScan<sup>30</sup> (command *mpileup2snp* counting all variants present in at least one read, with minimum coverage of one read and the additional strand filter option disabled) was used for mutation calling.

## **Analysis of whole genome sequencing data from cSCC tumors**

Whole genome sequencing data from 8 cSCC tumors and matching peritumoral skin samples was obtained from Durinck *et al.*, 2011<sup>37</sup>. Whole genome sequencing data from cSCC tumors and matching peritumoral skin from 5 patients with germline DNA repair deficiency due to homozygous frameshift mutations (C<sub>940</sub>del-1) in the *XPC* gene was obtained from Zheng *et al.*, 2014<sup>18</sup>. Samtools<sup>29</sup> (command *mpileup* with a minimum mapping quality of 30, a minimum base quality of 30 and additional option *-B*) was used to process the data and VarScan<sup>30</sup> (command *mpileup2snp* counting all variants present in at least one read, with

minimum coverage of two reads and the additional strand filter option disabled) was used for mutation calling. For the mutation probability analysis of cSCC tumors with NER deficiency an additional filter was applied to only consider mutations with a total coverage of at least 10 reads and a variant frequency of at least 0.2. The functional impact of mutations in driver genes was evaluated using PROVEAN<sup>38</sup> and SIFT<sup>39</sup>. Non-synonymous mutations that were considered deleterious by PROVEAN or damaging by SIFT were counted as driver mutations.

## Cell lines and UV treatments

A375 melanoma cells were a gift from Joydeep Bradbury and HaCaT keratinocyte cells were a gift from Maria Ericsson. Cells were grown in DMEM + 10% FCS + gentamycin (A375) or pen/strep (HaCaT) (Thermo Scientific). Cells were treated in DMEM in 10 cm plates without lids with 36 J/m<sup>2</sup> UVC 254 nm (equivalent to 6 hour daily dose at 0.1J/m<sup>2</sup>/min<sup>40</sup>, CL-1000 UV crosslinker, UVP), 5 days a week for 10 weeks. Cells were split when confluent and reseeded at 1:5. Cells were frozen at -20°C.

## DNA purification

DNA was extracted based on Tornaletti and Pfeifer<sup>41</sup>. Briefly, cell pellets were lysed in 0.5 ml of 20 mM Tris-HCl (pH 8.0), 20 mM NaCl, 20mM EDTA, 1% (w/v) sodium dodecyl sulfate, 600 mg/ml of proteinase K, and 0.5 ml of 150 mM NaCl, 10 mM EDTA. The solution was incubated for two hours at 37°C. DNA was extracted twice with phenol-chloroform and once with chloroform and precipitated by adding 0.1 vol. 3 M sodium acetate (pH 5.2), and 2.5 volumes of ethanol. The pellets were washed with 75% ethanol and briefly air-dried. DNA was dissolved in 10 mM Tris-HCl (pH 7.6), 1 mM EDTA (TE buffer) (all from Sigma Aldrich). DNA was treated with RNase for 1 hr at 37°C and phenol-chloroform extracted and ethanol precipitated before dissolving in TE buffer.

## Ultrasensitive mutation analysis

To detect and quantify mutations we applied SiMSen-Seq (Simple, Multiplexed, PCR-based barcoding of DNA for Sensitive mutation detection using Sequencing) as described<sup>28</sup>. Briefly, barcoding of 150 ng DNA was performed in 10 µL using 1x Phusion HF Buffer, 0.1U Phusion II High-Fidelity polymerase, 200 µM dNTPs (all Thermo Fisher Scientific), 40 nM of each primer (PAGE-purified, Integrated DNA Technologies) and 0.5M L-Carnitine inner salt (Sigma Aldrich). Barcode primer sequences are shown in **Supplementary Table 8**. The temperature profile was 98 °C for 3 min followed by three cycles of amplification (98 °C for



10 sec, 62 °C for 6 min and 72 °C for 30 sec), 65 °C for 15 min and 95 °C for 15 min. The reaction was terminated by adding 20 µL TE buffer, pH 8.0 (Invitrogen, Thermo Fisher Scientific) containing 30 ng/µL protease from *Streptomyces griseus* (Sigma Aldrich) at the beginning of the 65 °C incubation step. Next, 10 µL of the diluted barcoded PCR products were amplified in a 40 µL using 1x Q5 Hot Start High-Fidelity Master Mix (New England BioLabs) and 400 nM of each sequencing adapter primer. Adapter primers are shown in **Supplementary Table 8**. The temperature profile was 95 °C for 3 min followed by 40 cycles of amplification (98 °C for 10 sec, 80 °C for 1 sec, 72 °C for 30 sec and 76 °C for 30 sec, with a ramp rate of 0.2 °C/sec). The 40 µL PCR products were then purified using Agencourt AMPure XP beads (Beckman-Coulter) according to the manufacturers' instructions using a bead to sample ratio of 1. The purified product was eluted in 20 µL TE buffer, pH 8.0. Library concentration and quality was assessed using a Fragment Analyzer (Advanced Analytical). Final libraries were pooled to equal molarity in Buffer EB (10 mM Tris-HCl, pH 8.5, Qiagen) containing 0.1% TWEEN 20 (Sigma Aldrich).

Sequencing was performed on an Illumina NextSeq 500 instrument at Tataa Biocenter (Gothenburg, Sweden) using 150 bp single-end reads. Raw FastQ files were subsequently processed as described<sup>28</sup> using Debarcer Version 0.3.0 (<https://github.com/oicr-gsi/debarcer>). Sequence reads with the same barcode were grouped into families for each amplicon. Barcode families with at least 20 reads, where  $\geq 90$  % of the reads were identical, were required to compute consensus reads. FastQ files were deposited in the Sequence Read Archive (SRA).

## Acknowledgements

The results published here are in whole or part based upon data generated by The Cancer Genome Atlas pilot project established by the NCI and NHGRI. Information about TCGA and the investigators and institutions who constitute the TCGA research network can be found at <http://cancergenome.nih.gov>. We are most grateful to the patients, investigators, clinicians, technical personnel, and funding bodies who contributed to TCGA, thereby making this study possible. E.L. was supported by the Knut and Alice Wallenberg Foundation, the Swedish Foundation for Strategic Research, the Swedish Medical Research Council, the Swedish Cancer Society, the Åke Wiberg foundation, and the Lars Erik Lundberg Foundation for Research and Education. A.S. was supported by Sahlgrenska Academy-ALF, the Swedish Childhood Cancer Foundation, the Swedish Cancer Society, and the Wallenberg Centre for Molecular and Translational Medicine. Computations were in part performed on resources

provided by SNIC through Uppsala Multidisciplinary Center for Advanced Computational Science (UPPMAX) under project b2012108.

## Author contributions

J.F and E.L. conceived the study; J.F performed bioinformatics analyses; J.F and E.L. wrote the paper; K.E. performed cell culture and UV irradiation experiments; S.F. and A.S performed ultrasensitive amplicon sequencing.

## Competing financial interests

The applied SiMSen-Seq approach is patent pending (A.S.). The other authors declare no competing financial interests or other conflict of interest.

## References

1. Khurana, E. *et al.* Role of non-coding sequence variants in cancer. *Nat Rev Genet* **17**, 93-108 (2016).
2. Poulos, R.C., Sloane, M.A., Hesson, L.B. & Wong, J.W. The search for cis-regulatory driver mutations in cancer genomes. *Oncotarget* **6**, 32509-25 (2015).
3. Polak, P. *et al.* Cell-of-origin chromatin organization shapes the mutational landscape of cancer. *Nature* **518**, 360-364 (2015).
4. Lawrence, M. *et al.* Mutational heterogeneity in cancer and the search for new cancer-associated genes. *Nature* **499**, 214 - 218 (2013).
5. Pleasance, E.D. *et al.* A comprehensive catalogue of somatic mutations from a human cancer genome. *Nature* **463**, 191-196 (2010).
6. Perera, D. *et al.* Differential DNA repair underlies mutation hotspots at active promoters in cancer genomes. *Nature* **532**, 259-263 (2016).
7. Sabarinathan, R., Mularoni, L., Deu-Pons, J., Gonzalez-Perez, A. & López-Bigas, N. Nucleotide excision repair is impaired by binding of transcription factors to DNA. *Nature* **532**, 264-267 (2016).
8. Alexandrov, L. *et al.* Signatures of mutational processes in human cancer. *Nature* **500**, 415 - 421 (2013).
9. Araya, C.L. *et al.* Identification of significantly mutated regions across cancer types highlights a rich landscape of functional molecular alterations. *Nat Genet* **48**, 117-25 (2016).

10. Fredriksson, N.J., Ny, L., Nilsson, J.A. & Larsson, E. Systematic analysis of noncoding somatic mutations and gene expression alterations across 14 tumor types. *Nat Genet* **46**, 1258-63 (2014).
11. Cancer Genome Atlas Research, N. *et al.* The Cancer Genome Atlas Pan-Cancer analysis project. *Nat Genet* **45**, 1113-20 (2013).
12. Huang, F.W. *et al.* Highly recurrent TERT promoter mutations in human melanoma. *Science* **339**, 957-9 (2013).
13. Horn, S. *et al.* TERT promoter mutations in familial and sporadic melanoma. *Science* **339**, 959-61 (2013).
14. Helleday, T., Eshtad, S. & Nik-Zainal, S. Mechanisms underlying mutational signatures in human cancers. *Nat Rev Genet* **15**, 585-98 (2014).
15. Wei, G.H. *et al.* Genome-wide analysis of ETS-family DNA-binding in vitro and in vivo. *EMBO J* **29**, 2147-60 (2010).
16. Colebatch, A.J. *et al.* Clustered somatic mutations are frequent in transcription factor binding motifs within proximal promoter regions in melanoma and other cutaneous malignancies. *Oncotarget* **7**, 66569-66585 (2016).
17. Berger, M.F. *et al.* Melanoma genome sequencing reveals frequent PREX2 mutations. *Nature* **485**, 502-506 (2012).
18. Zheng, Christina L. *et al.* Transcription Restores DNA Repair to Heterochromatin, Determining Regional Mutation Rates in Cancer Genomes. *Cell Reports* **9**, 1228-1234 (2014).
19. Martincorena, I. *et al.* High burden and pervasive positive selection of somatic mutations in normal human skin. *Science* **348**, 880-886 (2015).
20. Denisova, E. *et al.* Frequent DPH3 promoter mutations in skin cancers. *Oncotarget* (2015).
21. Hollenhorst, P.C. *et al.* DNA Specificity Determinants Associate with Distinct Transcription Factor Functions. *PLoS Genet* **5**, e1000778 (2009).
22. Wang, J. *et al.* Sequence features and chromatin structure around the genomic regions bound by 119 human transcription factors. *Genome Research* **22**, 1798-1812 (2012).
23. Tanaka, M. *et al.* Cell-cycle-dependent regulation of human aurora A transcription is mediated by periodic repression of E4TF1. *J Biol Chem* **277**, 10719-26 (2002).
24. Gale, J.M., Nissen, K.A. & Smerdon, M.J. UV-induced formation of pyrimidine dimers in nucleosome core DNA is strongly modulated with a period of 10.3 bases. *Proc Natl Acad Sci U S A* **84**, 6644-8 (1987).

25. Brown, D.W., Libertini, L.J., Suquet, C., Small, E.W. & Smerdon, M.J. Unfolding of nucleosome cores dramatically changes the distribution of ultraviolet photoproducts in DNA. *Biochemistry* **32**, 10527-10531 (1993).
26. Pfeifer, G.P., Drouin, R., Riggs, A.D. & Holmquist, G.P. Binding of transcription factors creates hot spots for UV photoproducts in vivo. *Molecular and Cellular Biology* **12**, 1798-1804 (1992).
27. Tornaletti, S. & Pfeifer, G.P. UV Light as a Footprinting Agent: Modulation of UV-induced DNA Damage by Transcription Factors Bound at the Promoters of Three Human Genes. *Journal of Molecular Biology* **249**, 714-728 (1995).
28. Stahlberg, A. *et al.* Simple, multiplexed, PCR-based barcoding of DNA enables sensitive mutation detection in liquid biopsies using sequencing. *Nucleic Acids Res* **44**, e105 (2016).
29. Li, H. *et al.* The Sequence Alignment/Map format and SAMtools. *Bioinformatics* **25**, 2078-2079 (2009).
30. Koboldt, D.C. *et al.* VarScan 2: Somatic mutation and copy number alteration discovery in cancer by exome sequencing. *Genome Research* **22**, 568-576 (2012).
31. Harrow, J. *et al.* GENCODE: The reference human genome annotation for The ENCODE Project. *Genome Research* **22**, 1760-1774 (2012).
32. Gao, J. *et al.* Integrative Analysis of Complex Cancer Genomics and Clinical Profiles Using the cBioPortal. *Sci. Signal.* **6**, pl1- (2013).
33. Cerami, E. *et al.* The cBio Cancer Genomics Portal: An Open Platform for Exploring Multidimensional Cancer Genomics Data. *Cancer Discovery* **2**, 401-404 (2012).
34. Akrami, R. *et al.* Comprehensive Analysis of Long Non-Coding RNAs in Ovarian Cancer Reveals Global Patterns and Targeted DNA Amplification. *Plos One* **8**(2013).
35. Rice, P., Longden, I. & Bleasby, A. EMBOSS: The European Molecular Biology Open Software Suite. *Trends in Genetics* **16**, 276-277.
36. Siepel, A. *et al.* Evolutionarily conserved elements in vertebrate, insect, worm, and yeast genomes. *Genome Research* **15**, 1034-1050 (2005).
37. Durinck, S. *et al.* Temporal Dissection of Tumorigenesis in Primary Cancers. *Cancer Discovery* **1**, 137-143 (2011).
38. Choi, Y., Sims, G.E., Murphy, S., Miller, J.R. & Chan, A.P. Predicting the Functional Effect of Amino Acid Substitutions and Indels. *PLoS ONE* **7**, e46688 (2012).

39. Kumar, P., Henikoff, S. & Ng, P.C. Predicting the effects of coding non-synonymous variants on protein function using the SIFT algorithm. *Nat. Protocols* **4**, 1073-1081 (2009).
40. Harm, W. Biological determination of the germicidal activity of sunlight. *Radiat Res* **40**, 63-9 (1969).
41. Tornaletti, S. & Pfeifer, G.P. UV light as a footprinting agent: modulation of UV-induced DNA damage by transcription factors bound at the promoters of three human genes. *J Mol Biol* **249**, 714-28 (1995).
42. Forbes, S.A. *et al.* COSMIC: exploring the world's knowledge of somatic mutations in human cancer. *Nucleic Acids Research* **43**, D805-D811 (2015).

| Rec <sup>a</sup> | Chr <sup>b</sup> | Position  | Ref <sup>c</sup> | Var <sup>d</sup> | Sequence context <sup>e</sup> | Dist <sup>f</sup> | Gene <sup>g</sup> | Expr. tier <sup>h</sup> | P <sup>i</sup>      | Dist <sup>j</sup> | Gene <sup>k</sup> | Expr. tier <sup>l</sup> | P <sup>m</sup> |
|------------------|------------------|-----------|------------------|------------------|-------------------------------|-------------------|-------------------|-------------------------|---------------------|-------------------|-------------------|-------------------------|----------------|
| 11               | 19               | 49990694  | C                | T                | TCCGGACATTCTTCCGGTTGG         | -116              | <i>RPL13A</i>     | 3                       | 1                   |                   |                   |                         |                |
| 10               | 5                | 1295250   | C                | T                | CCGACCCCTCCGGGTCCCC           | -88               | <i>TEBT</i>       | 1                       | 0.456               |                   |                   |                         |                |
| 7                | 16               | 2510095   | C                | T                | AGCCACGCCCTTCCGGGAGG          | 15                | <i>C16orf59</i>   | 2                       | 0.679               |                   |                   |                         |                |
| 7                | 5                | 1295228   | C                | T                | GCCCAGCCCCCTCCGGGCCCT         | -66               | <i>TEBT</i>       | 1                       | 0.228               |                   |                   |                         |                |
| 5                | 2                | 26101489  | C                | T                | CGCCCCGGCCCTTCCGGTCTC         | -104              | <i>ASXL2</i>      | 2                       | 0.796               |                   |                   |                         |                |
| 5                | 10               | 105156316 | C                | T                | CAAATCCCGCCCTTCCGATTC         | -88               | <i>PDCD11</i>     | 3                       | 0.195               | -93               | <i>USMG5</i>      | 3                       | 0.28           |
| 5                | 11               | 61735192  | C                | T                | GAGCCCGCTCTTCCGGTGGG          | -60               | <i>FTH1</i>       | 3                       | 1                   | -260              | <i>AP003733.1</i> | 3                       | 0.262          |
| 5                | 11               | 61735191  | C                | T                | CGAGCCCGCTCTTCCGGTGG          | -59               | <i>FTH1</i>       | 3                       | 0.364               | -261              | <i>AP003733.1</i> | 3                       | 0.101          |
| 5                | 9                | 133454938 | C                | T/+T             | CCGGCTTTCCCTTCCGGCCGA         | -54               | <i>FUBP3</i>      | 3                       | 0.342               |                   |                   |                         |                |
| 5                | 17               | 79849513  | C                | T                | CGCGTGAGGCCCTTCCGGTGCC        | -51               | <i>ALYREF</i>     | 3                       | 0.666               |                   |                   |                         |                |
| 5                | 22               | 31556121  | C                | T                | AAATTAACCTCTTCCGGTGG          | -46               | <i>RNF185</i>     | 3                       | 0.388               |                   |                   |                         |                |
| 5                | 13               | 41345346  | C                | T                | CCGCCCCCTCTTCCGGCTTCC         | -37               | <i>MRPS31</i>     | 3                       | 0.262               |                   |                   |                         |                |
| 5                | 3                | 16306505  | C                | A/T/G            | AGGACTAGCCCTTCCGGCCGA         | -26               | <i>DPH3</i>       | 3                       | 0.0108 <sup>n</sup> | -200              | <i>OXNAD1</i>     | 3                       | 0.181          |
| 5                | 19               | 17970682  | C                | T                | GAGGGCGGGTCTTCCGGTAGT         | -2                | <i>RPL18A</i>     | 3                       | 0.11                |                   |                   |                         |                |
| 5                | 16               | 2510096   | C                | T                | GAGCCACGCCCTTCCGGGAG          | 16                | <i>C16orf59</i>   | 2                       | 0.545               |                   |                   |                         |                |
| 5                | 8                | 124054557 | C                | T                | CGAAACTTCCCTTCCGGGGA          | 106               | <i>DERL1</i>      | 3                       | 0.0697              | 350               | <i>WDR67</i>      | 3                       | 0.931          |
| 5                | 5                | 1295242   | C                | T                | CTCCGGGTCCCGGCCAGC            | -80               | <i>TEBT</i>       | 1                       | 0.73                |                   |                   |                         |                |
| 4                | 10               | 27443328  | C                | T                | AGCGCCTCGCCTTCCGGGGCG         | -424              | <i>MASTL</i>      | 2                       | 0.122               |                   |                   |                         |                |
| 4                | 11               | 111797698 | C                | T                | GTAGACAGCCCTTCCGGCCCC         | -169              | <i>DIXDC1</i>     | 2                       | 0.651               |                   |                   |                         |                |
| 4                | 12               | 54582890  | C                | T                | ATTTAGTGCGCCTTCCGGGAT         | -112              | <i>SMUG1</i>      | 3                       | 0.433               |                   |                   |                         |                |
| 4                | 12               | 54582889  | C                | T                | TTTAGTGCGCCTTCCGGGAT          | -111              | <i>SMUG1</i>      | 3                       | 0.868               |                   |                   |                         |                |
| 4                | 1                | 43824529  | C                | T                | AGGGGCGGGCCTTCCGGGGA          | -96               | <i>CDC20</i>      | 3                       | 0.405               |                   |                   |                         |                |
| 4                | 9                | 91933357  | C                | T                | CCCGCCCTTCTTCCGGGCCG          | -63               | <i>SECISBP2</i>   | 3                       | 0.757               |                   |                   |                         |                |
| 4                | 19               | 7459940   | C                | T                | GGGCACGCCCTTCCGGGGTC          | -58               | <i>ARHGEF18</i>   | 2                       | 0.207               |                   |                   |                         |                |
| 4                | 19               | 7459941   | C                | T                | GGCACGCCCTTCCGGGGTCA          | -57               | <i>ARHGEF18</i>   | 2                       | 0.981               |                   |                   |                         |                |
| 4                | 3                | 52322052  | C                | T                | GACGTCACTTCCGGCCCCCTA         | -16               | <i>WDR82</i>      | 3                       | 0.981               |                   |                   |                         |                |
| 4                | 21               | 34100374  | C                | T                | CGGGGCGGATCTTCCGGCCCC         | -15               | <i>SYNJ1</i>      | 2                       | 0.244               |                   |                   |                         |                |
| 4                | 2                | 128615744 | C                | T                | AGACCACGCCCTTCCGGCGGC         | -13               | <i>POLR2D</i>     | 3                       | 0.831               |                   |                   |                         |                |
| 4                | 6                | 30640796  | C                | T                | AAGTACAGCCCCTTCCGGGCT         | 18                | <i>DHX16</i>      | 3                       | 0.161               |                   |                   |                         |                |
| 4                | 19               | 17830242  | C                | T                | GTCTTCAGCCCTTCCGGGTGCG        | 192               | <i>MAP1S</i>      | 3                       | 0.191               |                   |                   |                         |                |
| 4                | 12               | 49412648  | C                | T                | GGTTCCTTGCCTTCCGGCCCCA        | 332               | <i>PRKAG1</i>     | 3                       | 0.306               |                   |                   |                         |                |
| 4                | 19               | 2151793   | C                | T                | ACTCCGCCCTTCTCCTAGTTC         | -228              | <i>AP3D1</i>      | 3                       | 0.943               |                   |                   |                         |                |

**Table 1 | Recurrent somatic mutations in promoter regions in melanoma are characterized by a distinct sequence signature.** 38 melanomas were analyzed for individual recurrently mutated bases in promoter regions. The table shows all mutations within +/- 500 bp from TSSs ordered by recurrence (number of mutated tumors). <sup>a</sup>Recurrence of each mutation. <sup>b</sup>Chromosome. <sup>c</sup>Reference base. <sup>d</sup>Variant base. <sup>e</sup>Sequence context 10 bases upstream and downstream of the mutation. Sequences were reverse complemented as required to always show the pyrimidine-containing strand with respect to the central mutated base (highlighted in gray). The motif CTTCCG is highlighted in yellow. <sup>f</sup>Distance from mutation to the 5' most TSS in GENCODE 17. Negative values indicate upstream location of mutation. <sup>g</sup>Closest gene. Genes included in the Cancer gene census (<http://cancer.sanger.ac.uk><sup>42</sup>) are highlighted in blue. <sup>h</sup>Genes were sorted by increasing mean expression (all samples) and assigned to expression tiers 1 to 3 with 3 being the highest. <sup>i</sup>P-values from a two-sided Wilcoxon rank sum test of differential expression of the gene between tumors with and without the mutation. <sup>j</sup>Distance from mutation to the second closest 5'-most TSS in GENCODE 17, when present within 500 bp. Negative values indicate an upstream location. <sup>k</sup>Second closest gene. <sup>l</sup>Same as column h for the second gene, when applicable. <sup>m</sup>P-values from a two-sided Wilcoxon rank sum test of differential expression of the gene comparing tumors with and without the mutation. <sup>n</sup>Significant differential expression could not be seen when the analysis was repeated in a larger dataset<sup>10</sup>.



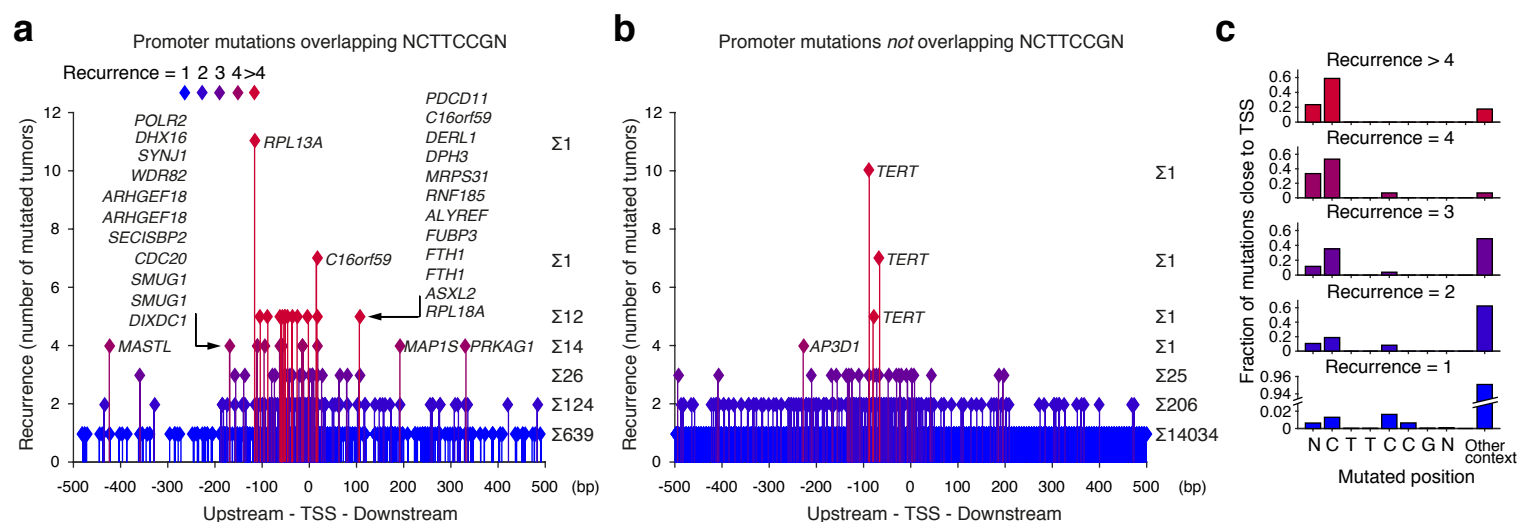

**Figure 1 | Recurrent somatic mutations in promoter regions in melanoma are characterized by a distinct sequence signature.** Whole genome sequencing data from 38 melanomas were analyzed for individual recurrently mutated bases in promoter regions, and most highly recurrent positions were found to share a distinct sequence context, CTTCCG (see **Table 1**). **(a)** All mutations occurring within +/- 500 bp of a TSS while overlapping with or being adjacent to the motif CTTCCG. The distance to the nearest TSS and the degree of recurrence (number of mutated tumors) is indicated. **(b)** Similar to panel **a**, but instead showing mutations *not* overlapping or adjacent to CTTCCG. **(c)** Positional distribution across the sequence NCTTCCGN for mutations indicated in panel **a**.

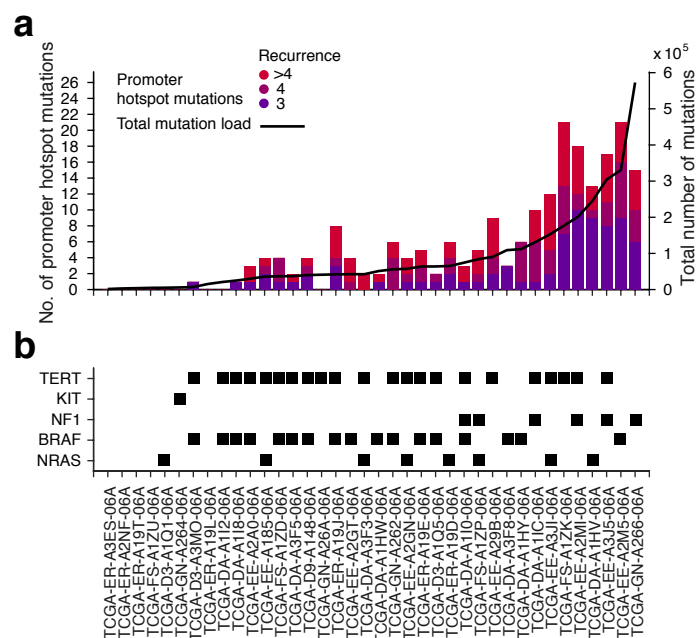

**Figure 2 | Positive correlation between promoter hotspot mutations and total mutational load across melanomas. (a)** Bars, left axis: Number of mutations occurring in the established recurrent CTTCCG-related promoter positions ( $\geq 3$  tumors) in each of the 38 samples. Line, right axis: Total mutational load per tumor (number of mutations across the whole genome). **(b)** Presence of *TERT* promoter mutations and mutations in known driver genes are indicated for all samples.

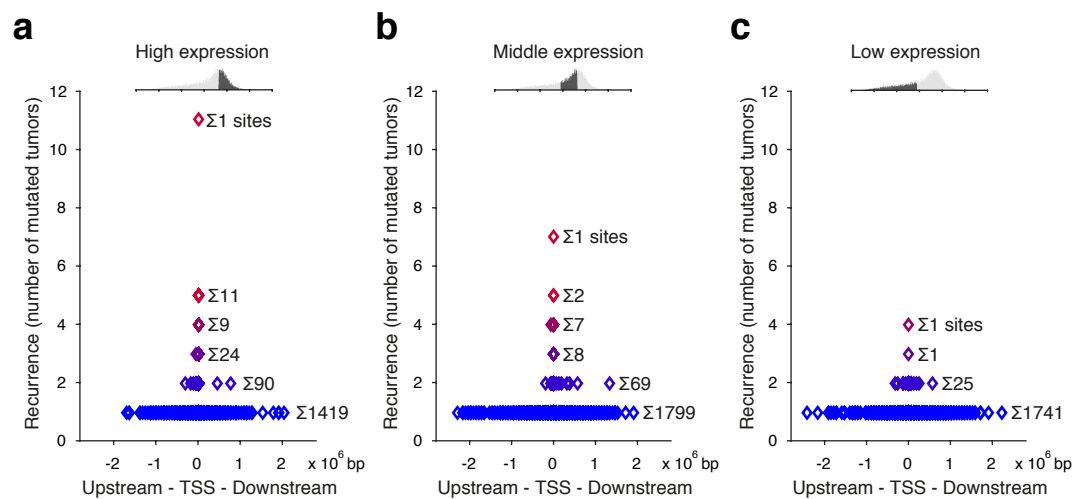

**Figure 3 | Recurrent mutations at CTTCCG sites are observed only near active promoters.** (a-c) Genes were assigned to three expression tiers by increasing mean expression across the 38 melanomas. The graphs show, on the x-axis, the distance to the nearest annotated TSS for all mutations overlapping with or being adjacent to the motif CTTCCG across the whole genome, separately for each expression tier. The level of recurrence is indicated on the y-axis.

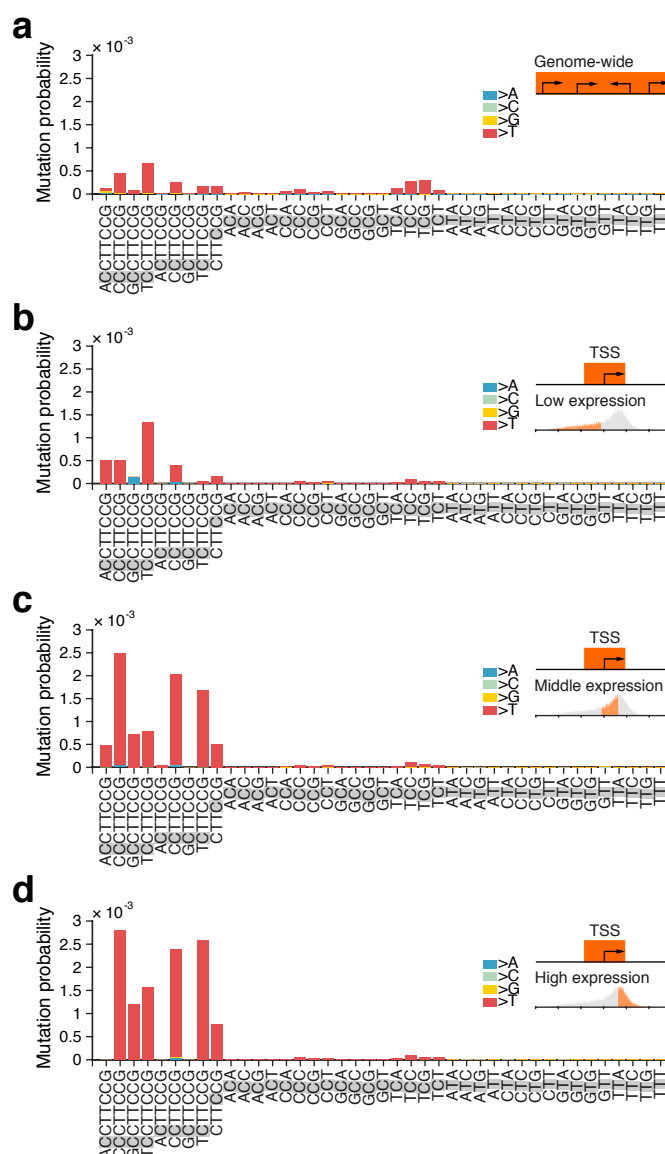

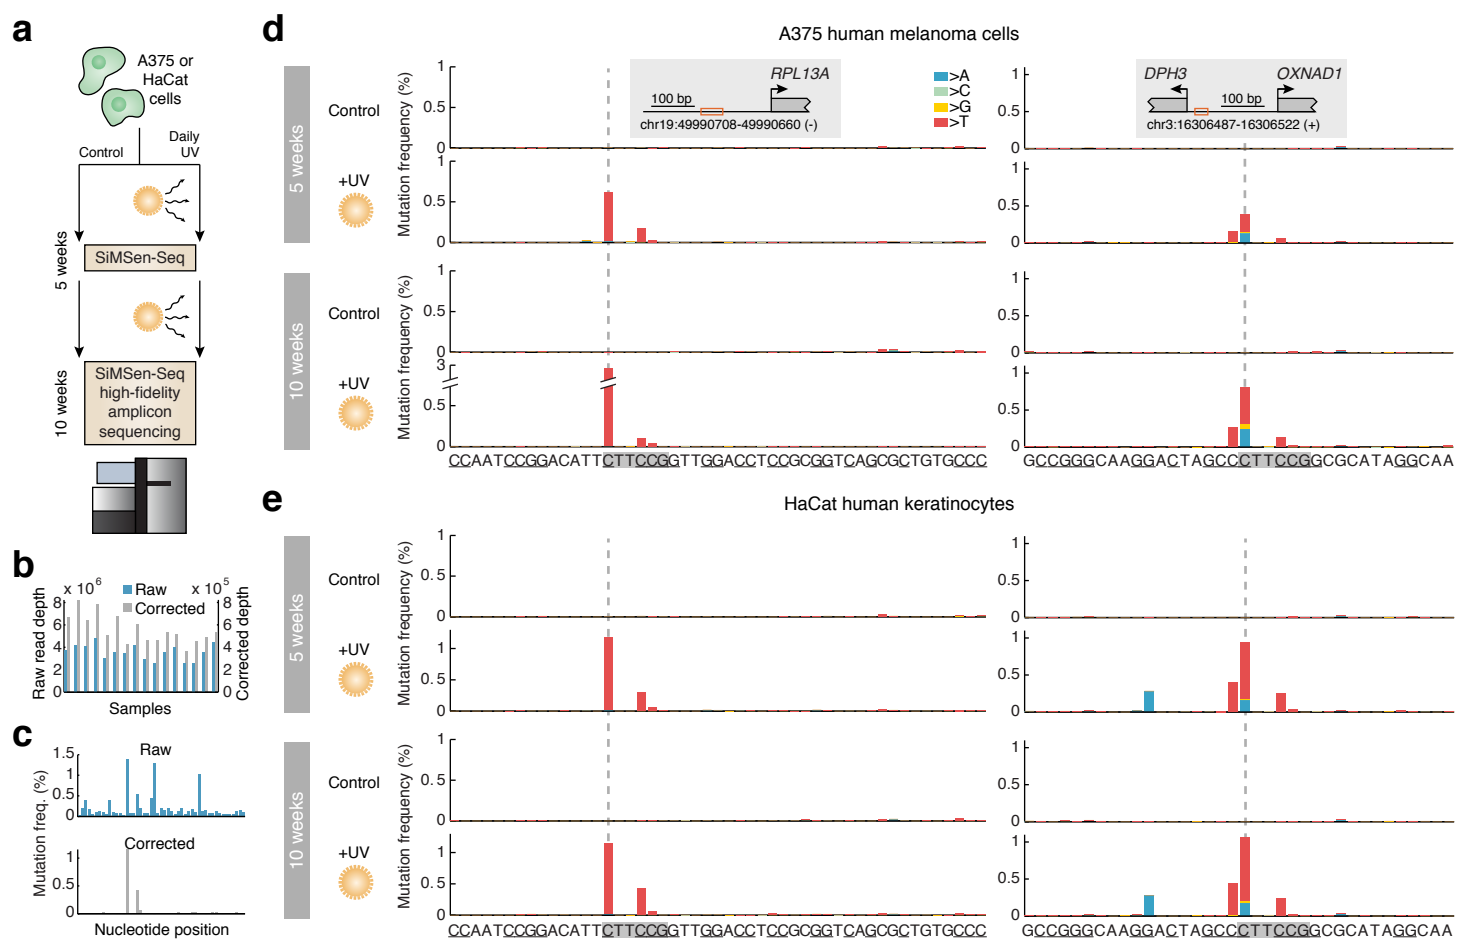

**Figure 5 | UV exposure of cultured cells induces mutations specifically at CTTCCG-related promoter hotspot sites.** (a) Human cells (A375 melanoma cells or HaCat human keratinocytes) were subjected daily UV doses (254 nm, 36 J/m<sup>2</sup> once a day, 5 days a week). An ultrasensitive amplicon sequencing protocol, SiMSen-Seq<sup>28</sup>, was used to assay for subclonal mutations in two of the established promoter hotspot sites after 5 or 10 weeks. (b) 16 different conditions (+/- UV, two regions, two time points, and two cell lines) were sequenced at 2.5M to 4.8M reads per library. Minimum 20 times oversampling was required, resulting in between 36k-82k error-corrected reads per library. (c) Example of raw and corrected mutation frequencies upstream of *RPL13A* (HaCat cells, 10 weeks UV exposure). (d-e) Subclonal mutations at or near CTTCCG hotspots upstream of *RPL13A* or *DPH3*, after 5 or 10 weeks of UV exposure. The hotspot sites are indicated, and other possible UV-susceptible sites (cytosines flanking pyrimidines) are underscored. The amplicon sizes were 49 and 36 bp, respectively.

## Supplementary figures

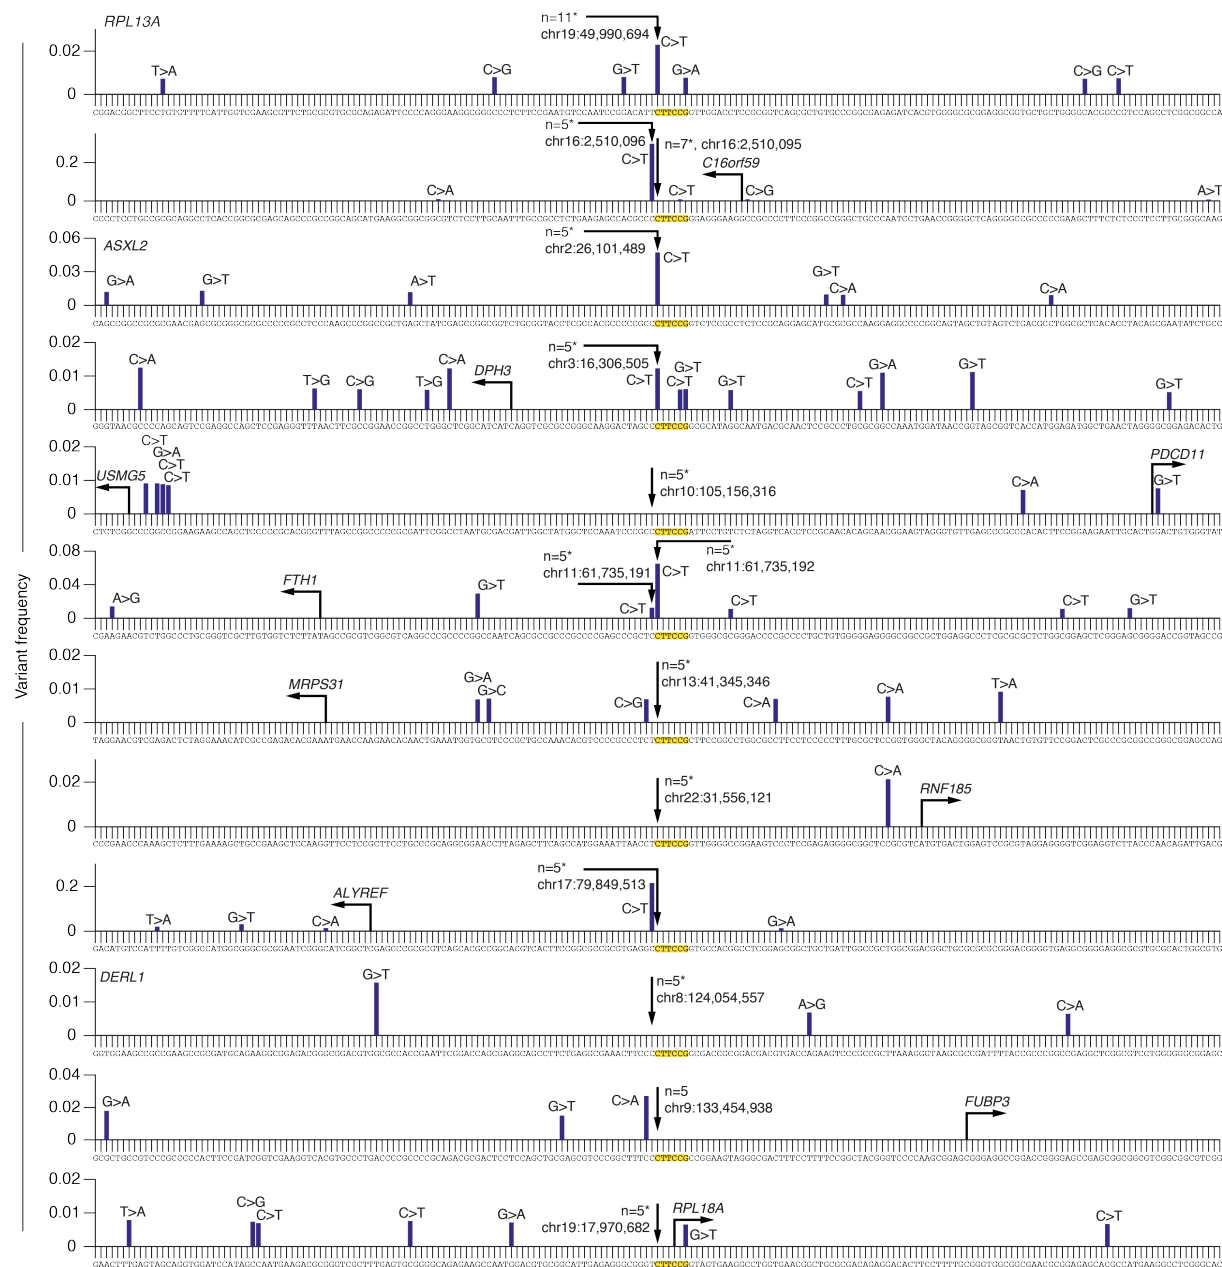

**Supplementary Figure 1 | Melanoma hotspot positions are often mutated in sun-exposed skin.** Recurrent CTTCCG-related promoter hotspot sites identified in melanoma (mutated in  $\geq 5/38$  TCGA tumors) were examined for mutations in a sample of sun-exposed normal skin. The graphs show variant allele frequencies for mutations in genomic regions centered on these sites, based on whole genome sequencing data from sun-exposed normal eyelid skin obtained from Martincorena *et al.*<sup>2</sup>. Known population variants were excluded, but all other deviations from the reference are shown regardless of allele frequency.



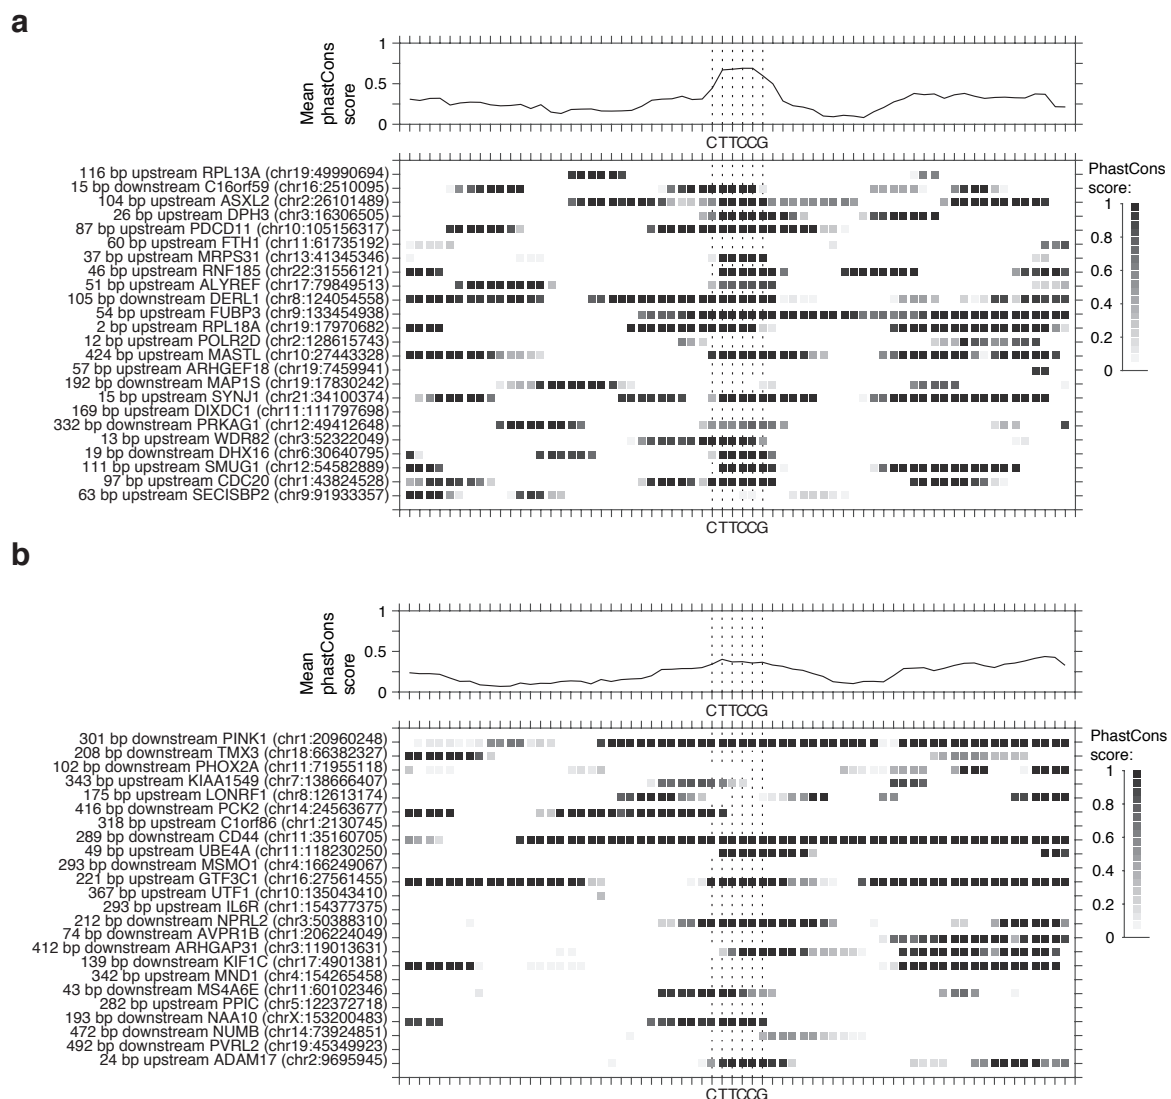

**Supplementary Figure 2 | Conservation in melanoma promoter hotspot sites.** PhastCons conservation scores at CTTCCG sites in melanoma promoter hotspot sites **(a)** and in 24 randomly chosen CTTCCG sites less than 500 bp from TSS of highly expressed genes, that were not mutated in any tumor **(b)**. PhastCons conservation scores were derived from multiple alignments of 100 vertebrate species and downloaded from the UCSC genome browser.

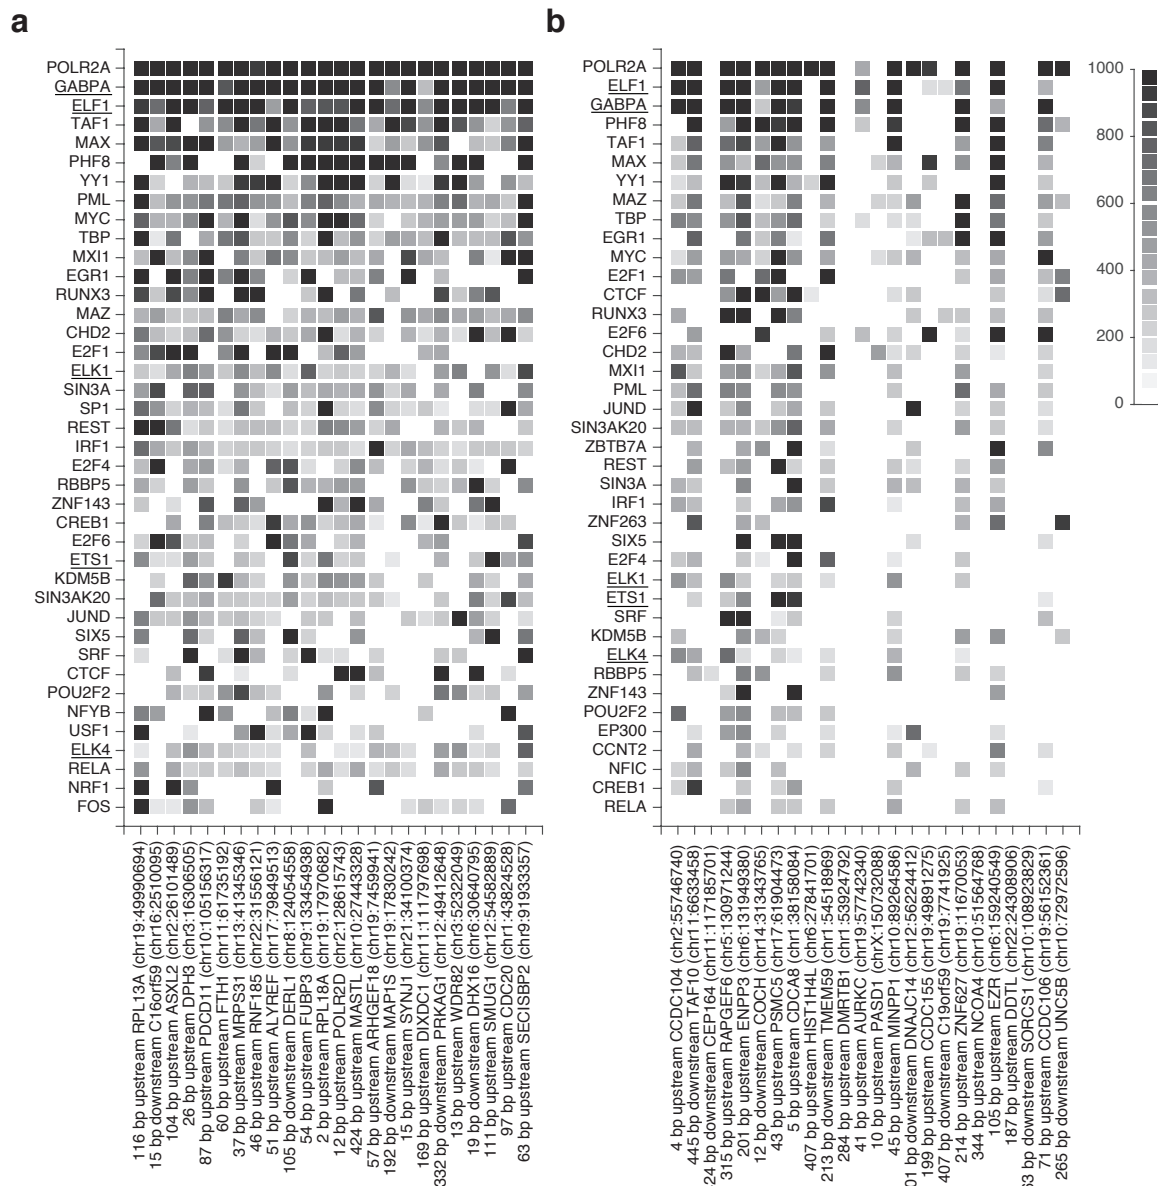

**Supplementary Figure 3 | Transcription factor binding in melanoma promoter hotspot sites.** Normalized scores for ChIP-seq peaks from 161 transcription factors in 91 cell types at NCTTCCGN sites (ENCODE track wgEncodeRegTfbsClusteredV3 obtained from the UCSC genome browser). **(a)** Promoter mutation hotspot sites. **(b)** 24 randomly chosen NCTTCCGN sites less than 500 bp from TSS of highly expressed genes that were not mutated in any tumor. In both panels, factors are ranked by mean signal across the 24 sites, with the 40 top factors being shown. Transcription factors from the ETS transcription factor family are underlined. The given genomic position for each site, indicated in the x-axis labels, is the location of the motif CTTCCG.

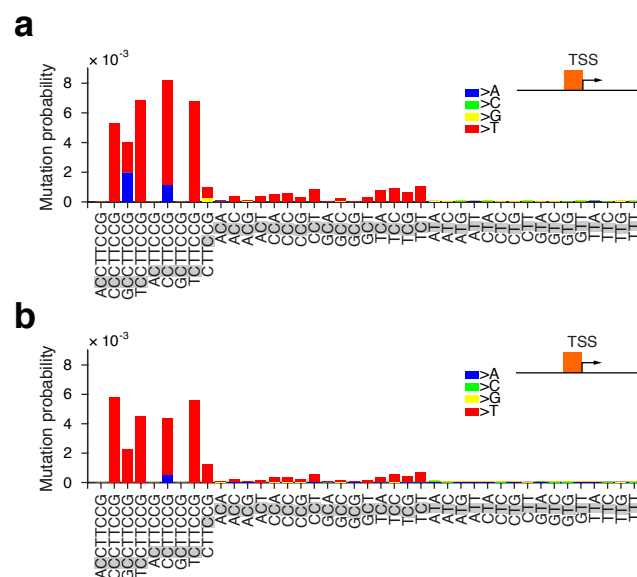

**Supplementary Figure 4 | Mutation probabilities for CTTCCG-related sequence contexts compared to trinucleotides in SCC tumors with NER deficiency.** 5 SCC tumors from patients with defective global genome NER<sup>3</sup> were screened for mutations within 500 bp upstream of TSSs, considering only genes in the upper mean expression tier level as defined earlier based on TCGA data. Mutation probabilities for different sequence contexts (trinucleotides and CTTCCG-related) were calculated in these regions, considering the template strand (**a**) and non-template strand (**b**) separately. The mutated position in each sequence context is shaded in gray. Bar colors indicate the substituting bases (mainly C>T). Only upstream regions were considered to avoid influence from transcription-coupled repair. The assignment to template and non-template strands was determined by the transcription direction of the downstream gene. Notably, transcription coupled repair is a strand-specific process, but elevated probabilities for CTTCCG-related context compared to trinucleotides were observed regardless of the strand orientation.

## Supplementary tables

| Rec <sup>a</sup> | Chr <sup>b</sup> | Position  | Ref <sup>c</sup> | Var <sup>d</sup> | Sequence context <sup>e</sup> | Dist <sup>f</sup> | Gene <sup>g</sup> | Expr. tier <sup>h</sup> | P <sup>i</sup> | Dist <sup>j</sup> | Gene <sup>k</sup> | Expr. tier <sup>l</sup> | P <sup>m</sup> |
|------------------|------------------|-----------|------------------|------------------|-------------------------------|-------------------|-------------------|-------------------------|----------------|-------------------|-------------------|-------------------------|----------------|
| 3                | 6                | 24721423  | C                | T                | CCCGCCACTCCTTCCGCCCC          | -359              | <i>C6orf62</i>    | 3                       | 0.13           |                   |                   |                         |                |
| 3                | 12               | 498776    | C                | T                | GTGACGCTTTCTTCCGGCGCG         | -156              | <i>KDM5A</i>      | 3                       | 0.787          | 263               | <i>CCDC77</i>     | 3                       | 0.0513         |
| 3                | 9                | 131038413 | C                | T                | GCCACGCCCTTCCGCTTCA           | -139              | <i>GOLGA2</i>     | 3                       | 0.871          |                   |                   |                         |                |
| 3                | 1                | 25559064  | C                | T                | AGCCCCGCCCTTCCGGGAGG          | -80               | <i>SYF2</i>       | 3                       | 0.552          |                   |                   |                         |                |
| 3                | 2                | 73964607  | C                | T                | CCCGCCCATTTCTCCGCTTCC         | -80               | <i>TPRKB</i>      | 3                       | 1              |                   |                   |                         |                |
| 3                | 22               | 35795975  | C                | T                | ACCTCGCCTCTTCCGGGCTC          | -80               | <i>MCM5</i>       | 3                       | 0.234          |                   |                   |                         |                |
| 3                | 19               | 1812349   | C                | T                | CCCCCGGCCCTTCCGGGGT           | -74               | <i>ATP8B3</i>     | 2                       | 0.516          |                   |                   |                         |                |
| 3                | 6                | 31940123  | C                | T                | AAAATAGGGTCTTCCGGCGCA         | -54               | <i>DOM3Z</i>      | 3                       | 0.588          |                   |                   |                         |                |
| 3                | 14               | 50779320  | C                | T                | CGGCTTCTTTCTTCCGGCTCG         | -54               | <i>L2HGDH</i>     | 2                       | 0.588          | 274               | <i>ATP5S</i>      | 2                       | 0.482          |
| 3                | 4                | 2936631   | C                | T                | ACGTTCTCTTCCGGCGCGAGT         | -45               | <i>MFS10</i>      | 3                       | 0.0832         |                   |                   |                         |                |
| 3                | 1                | 100598553 | C                | T                | CCATCGGATTCTTCCGGTTCT         | -42               | <i>SASS6</i>      | 2                       | 0.588          | -152              | <i>TRMT13</i>     | 2                       | 0.0513         |
| 3                | 3                | 101280671 | C                | T                | CCGCCCTCTCTTCCGGCGGC          | -34               | <i>TRMT10C</i>    | 3                       | 0.482          |                   |                   |                         |                |
| 3                | 11               | 1330918   | C                | T                | GGCACCGGCCCTTCCGGCTCT         | -34               | <i>TOLLIP</i>     | 3                       | 0.279          |                   |                   |                         |                |
| 3                | 22               | 43011002  | C                | T                | CGTCCCGGCCCTTCCGGTTC          | -34               | <i>POLDIP3</i>    | 3                       | 0.516          |                   |                   |                         |                |
| 3                | 2                | 70056751  | C                | T                | TTGCCCGGCCCTTCCGGAGG          | -22               | <i>GMCL1</i>      | 2                       | 0.957          |                   |                   |                         |                |
| 3                | 13               | 29233226  | C                | T                | GGACGCACTTCCGGCGGATGT         | -14               | <i>POMP</i>       | 3                       | 0.745          |                   |                   |                         |                |
| 3                | 10               | 7830002   | C                | T                | GCCCCACCTCTTCCGGCTCT          | -12               | <i>KIN</i>        | 2                       | 0.871          | -89               | <i>ATP5C1</i>     | 2                       | 0.588          |
| 3                | 2                | 198318145 | C                | T                | CCCCCTCTTCCCTTCCGGGTT         | -1                | <i>COQ10B</i>     | 3                       | 0.417          |                   |                   |                         |                |
| 3                | 7                | 23338823  | C                | T                | CCAAGTAGCTCTTCCGGGTCA         | 5                 | <i>MALSU1</i>     | 2                       | 0.213          |                   |                   |                         |                |
| 3                | 6                | 170893742 | C                | A/T              | CGCCTCTTGGCTTCCGGGCCG         | 6                 | <i>PDCD2</i>      | 3                       | 0.871          |                   |                   |                         |                |
| 3                | 13               | 41837733  | C                | T                | TGGTTCACCTCTTCCGGGTTA         | 9                 | <i>MTRF1</i>      | 2                       | 0.626          |                   |                   |                         |                |
| 3                | 11               | 46958262  | C                | T                | TCCCGTCCCCCTTCCGGCCCG         | 15                | <i>C11orf49</i>   | 3                       | 1              |                   |                   |                         |                |
| 3                | 20               | 57607411  | C                | T                | CGCCCCGCTCTTCCGGCTTCT         | 26                | <i>ATP5E</i>      | 3                       | 0.588          |                   |                   |                         |                |
| 3                | X                | 153059915 | C                | T                | ATTCACGCCCTTCCGGCGGC          | 63                | <i>IDH3G</i>      | 3                       | 0.256          |                   |                   |                         |                |
| 3                | 16               | 83841526  | C                | T                | CCTCGAGGCCCTTCCGGTGCG         | 79                | <i>HSBP1</i>      | 3                       | 0.665          |                   |                   |                         |                |
| 3                | 8                | 124054558 | C                | T                | GAAACTTCCCCTTCCGGCGAC         | 105               | <i>DERL1</i>      | 3                       | 0.914          | 351               | <i>WDR67</i>      | 3                       | 1              |
| 3                | 14               | 20585071  | C                | T                | CTGTGTTTTCCTCTCTATCT          | -494              | <i>OR4K17</i>     | 1                       | 0              |                   |                   |                         |                |
| 3                | 5                | 137800769 | C                | T                | GGCGGGGATCTCTCTGCTC           | -409              | <i>EGR1</i>       | 3                       | 0.705          |                   |                   |                         |                |
| 3                | 3                | 12883297  | C                | T                | GAAGTAAATCTCTCCCTCCAC         | -210              | <i>RPL32</i>      | 3                       | 0.914          |                   |                   |                         |                |
| 3                | 3                | 122135048 | C                | T                | ATGTTCAATTCCTGGTCTTTT         | -166              | <i>WDR5B</i>      | 2                       | 0.787          |                   |                   |                         |                |
| 3                | 11               | 47448149  | C                | T                | TTCTCCCTCTCTTCCGGTTT          | -156              | <i>PSMC3</i>      | 3                       | 0.957          |                   |                   |                         |                |
| 3                | 2                | 65283371  | C                | T                | CCCCCTACTTCTGCTGGCT           | -134              | <i>CEP68</i>      | 2                       | 0.588          |                   |                   |                         |                |
| 3                | 8                | 67579583  | C                | T                | ACTTGAGTCTCTCTGACT            | -131              | <i>VCPIP1</i>     | 2                       | 0.482          | -267              | <i>SGKL</i>       | 2                       | 0.871          |
| 3                | 19               | 54641318  | C                | T                | TGCCCCCTTCCGGGATTTGGG         | -125              | <i>CHOT3</i>      | 3                       | 0.705          |                   |                   |                         |                |
| 3                | 16               | 68119138  | C                | T                | CACGTGACTTCTCTCTCTCT          | -108              | <i>NFATC3</i>     | 2                       | 0.279          |                   |                   |                         |                |
| 3                | 1                | 38478324  | C                | T                | AGCCGGCTTTCAGGAAGTACG         | -89               | <i>UTP11L</i>     | 3                       | 0.279          |                   |                   |                         |                |
| 3                | 8                | 57124164  | C                | T                | GCCCACTCCCTCCGCTCGGC          | -80               | <i>CHCHD7</i>     | 3                       | 0.745          | -305              | <i>PLAG1</i>      | 3                       | 0.304          |
| 3                | 8                | 56987141  | C                | T                | CAGGAAATATCCCGGCCCTA          | -72               | <i>RPS20</i>      | 3                       | 0.213          |                   |                   |                         |                |
| 3                | 15               | 90931383  | C                | T                | GGCCCCGCTCTTCCGGGCCG          | -66               | <i>IQGAP1</i>     | 3                       | 0.159          |                   |                   |                         |                |
| 3                | 19               | 48867542  | C                | T                | CCCCCTCCCTCTTCCGGCTA          | -48               | <i>TMEM143</i>    | 2                       | 0.665          | -109              | <i>SYNGR4</i>     | 2                       | 0.664          |
| 3                | 19               | 48248748  | C                | T                | GCGCAGATTTCCACCTCTCT          | -30               | <i>GLTSCR2</i>    | 3                       | 0.116          |                   |                   |                         |                |
| 3                | 2                | 234763235 | C                | T                | TCCCTGCCTTCTCTCGGTTT          | -23               | <i>HJURP</i>      | 2                       | 0.957          |                   |                   |                         |                |
| 3                | 1                | 234509179 | C                | T                | CTTCTGTCTTCTCTTTATCT          | -22               | <i>COA6</i>       | 3                       | 0.516          |                   |                   |                         |                |
| 3                | 16               | 2510073   | C                | T                | AAGCGCGCCCTTCCCGGCCG          | -7                | <i>C16orf59</i>   | 2                       | 0.705          |                   |                   |                         |                |
| 3                | 14               | 55658403  | C                | T                | ATTCAAATATCGCACGGAGCA         | -7                | <i>DLGAP5</i>     | 2                       | 0.829          |                   |                   |                         |                |
| 3                | 19               | 36870099  | C                | T                | GCTCGAGTTCTTCCGGCTT           | 2                 | <i>ZFP14</i>      | 2                       | 0.256          |                   |                   |                         |                |
| 3                | 12               | 100660920 | C                | T                | GACGTCACTTCTGCGGCTTC          | 3                 | <i>SCYL2</i>      | 3                       | 0.417          | -63               | <i>DEPDC4</i>     | 3                       | 0.705          |
| 3                | 14               | 31028336  | C                | T                | GCCGACCGCTCTTCCGGGTT          | 8                 | <i>G2E3</i>       | 2                       | 0.552          |                   |                   |                         |                |
| 3                | 6                | 34855824  | C                | T                | GATCTTACTTCTGCTGCTCG          | 42                | <i>TAF11</i>      | 3                       | 0.957          |                   |                   |                         |                |
| 3                | 15               | 40675107  | C                | T                | GAGTGGGATTTCCACCCACTT         | 186               | <i>KNSTRN</i>     | 3                       | 0.829          |                   |                   |                         |                |
| 3                | 1                | 242011463 | C                | T                | GACGTACATCTCTGGGCGG           | 195               | <i>EXO1</i>       | 2                       | 0.914          |                   |                   |                         |                |

**Supplementary Table 1 | Genomic positions close to transcription start sites recurrently mutated in 3/38 melanomas.** The table complements main **Table 1** and shows sites with a lower degree of mutation recurrence (3/38 melanomas, 8%), but is otherwise identical to main **Table 1**. Approximately 50% of sites at this level of recurrence conform to the CTTCCG pattern.

| Rec | Chr | Pos       | Ref | Var   | Context                | Dist | Gene     | Freq <sup>a</sup> | Berger freq. <sup>b</sup> |
|-----|-----|-----------|-----|-------|------------------------|------|----------|-------------------|---------------------------|
| 11  | 19  | 49990694  | C   | T     | TCCGGACATTCTTCCGGTTGG  | -116 | RPL13A   | 0,29              | 0,12                      |
| 10  | 5   | 1295250   | C   | T     | CCCGACCCCTCCGGGTCCCC   | -88  | TERT     | 0,26              | 0,48                      |
| 7   | 16  | 2510095   | C   | T     | AGCCACGCCCCTTCCGGGAGG  | 15   | C16orf59 | 0,18              | 0,12                      |
| 7   | 5   | 1295228   | C   | T     | GCCCAGCCCCCTCCGGGCCCT  | -66  | TERT     | 0,18              | 0,2                       |
| 5   | 2   | 26101489  | C   | T     | CGCCCCCGCCCTTCCGGTCTC  | -104 | ASXL2    | 0,13              | 0,04                      |
| 5   | 10  | 105156316 | C   | T     | CAAATCCCGCCCTTCCGGATTC | -88  | PDCD11   | 0,13              | 0,08                      |
| 5   | 11  | 61735192  | C   | T     | GAGCCCGCTCTTCCGGTGGG   | -60  | FTH1     | 0,13              | 0,08                      |
| 5   | 11  | 61735191  | C   | T     | CGAGCCCGCTCTTCCGGTGG   | -59  | FTH1     | 0,13              | 0,04                      |
| 5   | 9   | 133454938 | C   | T/+T  | CCGGCTTTCCCTTCCGCCGA   | -54  | FUBP3    | 0,13              | 0                         |
| 5   | 17  | 79849513  | C   | T     | CGCGTGAGGCCCTTCCGGTGCC | -51  | ALYREF   | 0,13              | 0,04                      |
| 5   | 22  | 31556121  | C   | T     | AAATTAACCTCTTCCGGTTGG  | -46  | RNF185   | 0,13              | 0,08                      |
| 5   | 13  | 41345346  | C   | T     | CCCGCCCTCTTCCGGTTCC    | -37  | MRPS31   | 0,13              | 0                         |
| 5   | 3   | 16306505  | C   | A/T/G | AGGACTAGCCCTTCCGGCGCA  | -26  | DPH3     | 0,13              | 0,04 <sup>c</sup>         |
| 5   | 19  | 17970682  | C   | T     | GAGGGCGGGTCTTCCGGTAGT  | -2   | RPL18A   | 0,13              | 0,12                      |
| 5   | 16  | 2510096   | C   | T     | GAGCCAGCCCCCTTCCGGGAG  | 16   | C16orf59 | 0,13              | 0,08                      |
| 5   | 8   | 124054557 | C   | T     | CGAAACTTCCCCTTCCGGCGA  | 106  | DERL1    | 0,13              | 0                         |
| 5   | 5   | 1295242   | C   | T     | CTCCCGGGTCCCCGGCCAGC   | -80  | TERT     | 0,13              | 0                         |
| 4   | 10  | 27443328  | C   | T     | AGCGCCTCGCCCTTCCGGGCG  | -424 | MASTL    | 0,11              | 0,04                      |
| 4   | 11  | 111797698 | C   | T     | GTAGACAGGCCCTTCCGGCCCC | -169 | DIXDC1   | 0,11              | 0                         |
| 4   | 12  | 54582890  | C   | T     | ATTTAGTGCCTTCCGGGAT    | -112 | SMUG1    | 0,11              | 0                         |
| 4   | 12  | 54582889  | C   | T     | TTTAGTGCCTTCCGGGATT    | -111 | SMUG1    | 0,11              | 0,08                      |
| 4   | 1   | 43824529  | C   | T     | AGGGGGCGGGCTTCCGGGGA   | -96  | CDC20    | 0,11              | 0,08                      |
| 4   | 9   | 91933357  | C   | T     | CCCGCCCTTTCTTCCGGCCGG  | -63  | SECISBP2 | 0,11              | 0                         |
| 4   | 19  | 7459940   | C   | T     | GGGCACGCCTCTTCCGGGTC   | -58  | ARHGEF18 | 0,11              | 0,08                      |
| 4   | 19  | 7459941   | C   | T     | GGCACGCCTCTTCCGGGTCA   | -57  | ARHGEF18 | 0,11              | 0,08                      |
| 4   | 3   | 52322052  | C   | T     | GACGTCACTTCCGGCCCCCTA  | -16  | WDR82    | 0,11              | 0                         |
| 4   | 21  | 34100374  | C   | T     | CGGGGCGGATCTTCCGGCCCC  | -15  | SYNJ1    | 0,11              | 0,04                      |
| 4   | 2   | 128615744 | C   | T     | AGACCACGCCCCCTTCCGGCGC | -13  | POLR2D   | 0,11              | 0,04                      |
| 4   | 6   | 30640796  | C   | T     | AAGTACAGCCCCCTTCCGGGCT | 18   | DHX16    | 0,11              | 0                         |
| 4   | 19  | 17830242  | C   | T     | GTCTTCAGCCCTTCCGGTGCG  | 192  | MAP1S    | 0,11              | 0                         |
| 4   | 12  | 49412648  | C   | T     | GGTTCTTGCCCTTCCGGCCCCA | 332  | PRKAG1   | 0,11              | 0                         |
| 4   | 19  | 2151793   | C   | T     | ACTCCGCTTCTTCTAGTTTC   | -228 | AP3D1    | 0,11              | 0                         |

**Supplementary Table 2 | The identified promoter hotspot positions are frequently mutated also in an independent set of melanomas.** <sup>a</sup>Mutation frequency (fraction of tumors having a mutation) in the original analysis based on 38 TCGA tumors, as shown also in main **Table 1**. <sup>b</sup>Mutation frequencies for these sites across 25 melanoma tumors as reported by Berger *et al.* <sup>4</sup>. <sup>c</sup>0.08 was previously obtained using a different calling pipeline applied to the same data<sup>5</sup> while 0.04 refers to the calls provided by Berger *et al.* See main **Table 1** for an explanation of remaining columns.

| Sample                                               | WT9     | WT11    | WT12  | WT10    | WT13   | WT8     | WT6    | WT7     | Total mut. freq. <sup>a</sup> | TCGA SKCM mut. freq. <sup>b</sup> |
|------------------------------------------------------|---------|---------|-------|---------|--------|---------|--------|---------|-------------------------------|-----------------------------------|
| RPL13A<br>chr19:49990694                             | (0.19)  | (0.083) | -     | -       | 0.33   | 0.54    | 0.47   | (0.051) | 0.38                          | 0.29                              |
| C16orf59<br>chr16:2510095                            | (0.08)  | -       | -     | -       | -      | -       | -      | -       | 0                             | 0.18                              |
| ASXL2<br>chr2:26101489                               | -       | -       | -     | 0.62    | -      | -       | 0.32   | (0.16)  | 0.25                          | 0.13                              |
| PDCD11<br>chr10:105156316                            | 0.36    | -       | -     | -       | -      | -       | -      | 0.46    | 0.25                          | 0.13                              |
| FTH1<br>chr11:61735192                               | -       | -       | 1     | -       | 0.43   | -       | -      | 0.41    | 0.38                          | 0.13                              |
| FTH1<br>chr11:61735191                               | (0.059) | 0.75    | 0.67  | -       | -      | 0.7     | (0.12) | 0.33    | 0.5                           | 0.13                              |
| FUBP3<br>chr9:133454938                              | -       | -       | -     | -       | -      | -       | -      | -       | 0                             | 0.13                              |
| ALYREF<br>chr17:79849513                             | -       | 0.21    | -     | 0.41    | -      | -       | -      | 0.28    | 0.38                          | 0.13                              |
| RNF185<br>chr22:31556121                             | -       | -       | -     | -       | -      | -       | 0.39   | -       | 0.12                          | 0.13                              |
| MRPS31<br>chr13:41345346                             | -       | -       | -     | -       | -      | -       | -      | -       | 0                             | 0.13                              |
| DPH3 chr3:16306505                                   | -       | -       | -     | 0.25    | -      | (0.16)  | 0.57   | -       | 0.25                          | 0.13                              |
| RPL18A<br>chr19:17970682                             | -       | (0.14)  | -     | -       | -      | -       | -      | -       | 0                             | 0.13                              |
| C16orf59<br>chr16:2510096                            | -       | -       | -     | (0.025) | 0.45   | -       | -      | (0.054) | 0.12                          | 0.13                              |
| DERL1<br>chr8:124054557                              | -       | -       | -     | 0.23    | -      | -       | -      | -       | 0.12                          | 0.13                              |
| MASTL<br>chr10:27443328                              | -       | -       | -     | -       | -      | -       | -      | -       | 0                             | 0.11                              |
| DIXDC1<br>chr11:111797698                            | -       | -       | -     | -       | -      | -       | 0.56   | -       | 0.12                          | 0.11                              |
| SMUG1<br>chr12:54582890                              | -       | -       | -     | -       | -      | -       | 0.41   | (0.16)  | 0.12                          | 0.11                              |
| SMUG1<br>chr12:54582889                              | -       | (0.17)  | -     | -       | -      | -       | 0.42   | -       | 0.12                          | 0.11                              |
| CDC20<br>chr1:43824529                               | -       | -       | -     | 0.24    | -      | (0.026) | 0.78   | 0.2     | 0.25                          | 0.11                              |
| SECISBP2<br>chr9:91933357                            | -       | -       | -     | -       | 0.8    | -       | -      | -       | 0.12                          | 0.11                              |
| ARHGEF18<br>chr19:7459940                            | 0.21    | -       | 0.88  | -       | 0.21   | 0.23    | 0.47   | 0.63    | 0.75                          | 0.11                              |
| ARHGEF18<br>chr19:7459941                            | -       | -       | 0.83  | -       | -      | -       | -      | 0.3     | 0.25                          | 0.11                              |
| WDR82<br>chr3:52322052                               | -       | -       | -     | -       | -      | -       | -      | -       | 0                             | 0.11                              |
| SYNJ1<br>chr21:34100374                              | -       | -       | -     | -       | -      | -       | -      | 0.52    | 0.12                          | 0.11                              |
| POLR2D<br>chr2:128615744                             | (0.033) | -       | -     | 0.55    | -      | -       | -      | -       | 0.12                          | 0.11                              |
| DHX16<br>chr6:30640796                               | -       | -       | -     | -       | -      | -       | -      | -       | 0                             | 0.11                              |
| MAPIS<br>chr19:17830242                              | -       | -       | 0.67  | (0.029) | -      | -       | -      | (0.023) | 0.12                          | 0.11                              |
| PRKAG1<br>chr12:49412648                             | -       | -       | -     | -       | -      | (0.069) | -      | (0.04)  | 0                             | 0.11                              |
| Total no. of mutations <sup>c</sup>                  | 24961   | 64326   | 85537 | 88427   | 116673 | 119549  | 224931 | 267306  |                               |                                   |
| Total no. of promoter hotspot mutations <sup>d</sup> | 2       | 2       | 5     | 6       | 5      | 3       | 9      | 7       |                               |                                   |
| NOTCH1 <sup>e</sup>                                  | 1       | 1       | 3     | 1       | 0      | 1       | 3      | 1       |                               |                                   |
| NOTCH2                                               | 0       | 2       | 2     | 1       | 2      | 1       | 4      | 2       |                               |                                   |
| CDKN2A                                               | 0       | 1       | 0     | 0       | 1      | 0       | 1      | 1       |                               |                                   |
| TP53                                                 | 0       | 0       | 1     | 1       | 1      | 0       | 1      | 2       |                               |                                   |
| Total no. of driver mutations                        | 1       | 4       | 6     | 3       | 4      | 2       | 9      | 6       |                               |                                   |

**Supplementary Table 3 | Mutations in promoter hotspots in cSCC tumors.** Melanoma hotspot positions were investigated in 8 cSCC tumors<sup>1</sup>. In cases where mutations are present, the variant allele frequency is shown for each individual sample (columns) and site (rows), with variant frequencies below 0.2 given within parentheses. <sup>a</sup>Mutation frequency across the 8 cSCC tumors<sup>1</sup>, only considering mutations with a variant frequency of at least 0.2. <sup>b</sup>Mutation frequency across the 38 TCGA melanoma tumors. <sup>c</sup>Total number of called mutations as reported by Zheng *et al.*<sup>3</sup>. <sup>d</sup>Number of promoter hotspot mutations with variant frequency of at least 0.2. <sup>e</sup>Number of deleterious mutations in SCC driver genes with a variant frequency of



Fredriksson et al.

Supplementary Information

at least 0.2. Non-synonymous mutations that were considered deleterious by PROVEAN<sup>6</sup> or damaging by SIFT<sup>7</sup> were counted as driver mutations.

| Sample                                               | WT9   | WT11  | WT12  | WT10  | WT13   | WT8     | WT6     | WT7     | Total mut. freq. <sup>a</sup> | TCGA SKCM mut. freq. <sup>b</sup> |
|------------------------------------------------------|-------|-------|-------|-------|--------|---------|---------|---------|-------------------------------|-----------------------------------|
| RPL13A<br>chr19:49990694                             | -     | -     | -     | (0.1) | -      | -       | -       | -       | 0                             | 0.29                              |
| C16orf59<br>chr16:2510095                            | -     | -     | -     | -     | -      | -       | -       | -       | 0                             | 0.18                              |
| ASXL2<br>chr2:26101489                               | -     | -     | -     | -     | -      | (0.05)  | -       | (0.038) | 0                             | 0.13                              |
| PDCD11<br>chr10:105156316                            | -     | -     | -     | -     | -      | -       | -       | -       | 0                             | 0.13                              |
| FTH1<br>chr11:61735192                               | -     | -     | -     | -     | -      | -       | -       | -       | 0                             | 0.13                              |
| FTH1<br>chr11:61735191                               | -     | -     | -     | -     | -      | -       | -       | -       | 0                             | 0.13                              |
| FUBP3<br>chr9:133454938                              | -     | -     | -     | -     | -      | -       | -       | -       | 0                             | 0.13                              |
| ALYREF<br>chr17:79849513                             | -     | -     | -     | -     | -      | -       | -       | -       | 0                             | 0.13                              |
| RNF185<br>chr22:31556121                             | -     | -     | -     | -     | -      | -       | (0.053) | -       | 0                             | 0.13                              |
| MRPS31<br>chr13:41345346                             | -     | -     | -     | -     | -      | (0.033) | -       | (0.028) | 0                             | 0.13                              |
| DPH3 chr3:16306505                                   | -     | -     | -     | -     | -      | -       | -       | (0.03)  | 0                             | 0.13                              |
| RPL18A<br>chr19:17970682                             | -     | -     | -     | -     | (0.12) | -       | (0.12)  | -       | 0                             | 0.13                              |
| C16orf59<br>chr16:2510096                            | -     | -     | -     | -     | -      | -       | (0.071) | -       | 0                             | 0.13                              |
| DERL1<br>chr8:124054557                              | -     | -     | -     | -     | -      | -       | -       | -       | 0                             | 0.13                              |
| MASTL<br>chr10:27443328                              | -     | -     | -     | -     | -      | -       | -       | -       | 0                             | 0.11                              |
| DIXDC1<br>chr11:111797698                            | -     | -     | -     | -     | -      | -       | -       | -       | 0                             | 0.11                              |
| SMUG1<br>chr12:54582890                              | -     | -     | -     | -     | -      | -       | -       | 0.23    | 0.12                          | 0.11                              |
| SMUG1<br>chr12:54582889                              | -     | -     | -     | -     | -      | -       | -       | -       | 0                             | 0.11                              |
| CDC20<br>chr1:43824529                               | -     | -     | -     | -     | -      | -       | -       | (0.034) | 0                             | 0.11                              |
| SECISBP2<br>chr9:91933357                            | -     | -     | -     | -     | (0.18) | (0.034) | -       | -       | 0                             | 0.11                              |
| ARHGEF18<br>chr19:7459940                            | -     | -     | -     | -     | -      | -       | -       | (0.036) | 0                             | 0.11                              |
| ARHGEF18<br>chr19:7459941                            | -     | -     | -     | -     | -      | -       | -       | (0.036) | 0                             | 0.11                              |
| WDR82<br>chr3:52322052                               | -     | -     | -     | -     | -      | -       | -       | -       | 0                             | 0.11                              |
| SYNJ1<br>chr21:34100374                              | -     | -     | -     | -     | -      | -       | -       | -       | 0                             | 0.11                              |
| POLR2D<br>chr2:128615744                             | -     | -     | -     | -     | -      | -       | -       | -       | 0                             | 0.11                              |
| DHX16<br>chr6:30640796                               | -     | -     | -     | -     | -      | -       | -       | -       | 0                             | 0.11                              |
| MAPIS<br>chr19:17830242                              | -     | -     | -     | -     | -      | -       | -       | -       | 0                             | 0.11                              |
| PRKAG1<br>chr12:49412648                             | -     | -     | -     | -     | -      | -       | -       | -       | 0                             | 0.11                              |
| Total no. of mutations <sup>c</sup>                  | 24961 | 64326 | 85537 | 88427 | 116673 | 119549  | 224931  | 267306  |                               |                                   |
| Total no. of promoter hotspot mutations <sup>d</sup> | 0     | 0     | 0     | 0     | 0      | 0       | 0       | 1       |                               |                                   |

**Supplementary Table 4 | Mutations in promoter hotspots in skin samples.** Mutations in promoter hotspots were found at low variant frequencies in 8 peritumoral skin samples<sup>3</sup> that were available as matching normals for the cSCC tumors analyzed in **Supplementary Table 3**. In cases where mutations are present, the variant allele frequency is shown for each individual sample (columns) and site (rows), with variant frequencies below 0.2 given within parentheses. <sup>a</sup>Mutation frequency across the 8 samples, only considering mutations with a variant frequency of at least 0.2. <sup>b</sup>Mutation frequency across the 38 TCGA melanoma tumors; <sup>c</sup>Total number of called mutations as reported by Zheng *et al.* <sup>3</sup>. <sup>d</sup>Number of promoter hotspot mutations with variant frequency of at least 0.2.

| Cancer                | Mutation load <sup>a</sup> | UV radiation <sup>b</sup> | Mutational signatures <sup>c</sup> | TERT promoter mutations <sup>d</sup> | Melanoma promoter hotspots <sup>e</sup> |
|-----------------------|----------------------------|---------------------------|------------------------------------|--------------------------------------|-----------------------------------------|
| Prostate, PRAD        | 1361                       |                           |                                    |                                      |                                         |
| Thyroid, THCA         | 2055                       |                           | 2                                  | +                                    |                                         |
| Low-grade glioma, LGG | 2873                       |                           |                                    | +                                    |                                         |
| Kidney (chrom.), KICH | 5147                       |                           |                                    |                                      |                                         |
| Breast, BRCA          | 6194                       |                           | 2, 13                              |                                      |                                         |
| Kidney (clear), KIRC  | 7234                       |                           |                                    |                                      |                                         |
| Head & neck, HNSC     | 7324                       |                           | 2, 7                               |                                      |                                         |
| Uterus, UCEC          | 8352                       |                           | 2                                  |                                      |                                         |
| Glioblastoma, GBM     | 9240                       |                           | 11                                 | +                                    |                                         |
| Bladder, BLCA         | 16011                      |                           | 2, 13                              | +                                    |                                         |
| Lung (adeno), LUAD    | 18942                      |                           | 2                                  | +                                    |                                         |
| Colorectal, CRC       | 21994                      |                           |                                    |                                      |                                         |
| Lung (squamous), LUSC | 37741                      |                           | 2                                  |                                      |                                         |
| Melanoma, SKCM        | 52663                      | +                         | 7, 11                              | +                                    | +                                       |
| Skin, cSCC            | 102550                     | +                         | - <sup>f</sup>                     | - <sup>f</sup>                       | +                                       |

**Supplementary Table 5 | Mutational characteristics and promoter hotspot mutations in different cancer types.** <sup>a</sup>Median number of somatic mutations per tumor derived from whole-genome sequencing data. cSCC counts from Zheng *et al.* <sup>3</sup>. All other counts from Fredriksson *et al.* <sup>8</sup>. <sup>b</sup>UV-radiation as the mutational process driving tumor development. <sup>c</sup>Presence of mutational signatures 2, 7, 11 or 13 <sup>9</sup>, all of which have elevated ratios of C to T mutations in CCT or TCT contexts, which allow for mutations of melanoma promoter hotspot sites. <sup>d</sup>Presence of TERT promoter mutations<sup>8</sup>. <sup>e</sup>Presence of melanoma promoter hotspot mutations. <sup>f</sup>Data not available.

| Rank | Name  | p-value  | E-value  | q-value  | Overlap | Offset | Orientation        |
|------|-------|----------|----------|----------|---------|--------|--------------------|
| 1    | ETV6  | 5.06e-05 | 3.25e-02 | 4.07e-02 | 6       | 2      | Reverse Complement |
| 2    | GABPA | 6.75e-05 | 4.33e-02 | 4.07e-02 | 6       | 3      |                    |
| 3    | ELK1  | 1.14e-04 | 7.33e-02 | 4.07e-02 | 6       | 1      | Reverse Complement |
| 4    | ELK4  | 1.28e-04 | 8.22e-02 | 4.07e-02 | 6       | 3      |                    |
| 5    | GABP1 | 1.80e-04 | 1.16e-01 | 4.58e-02 | 6       | 3      | Reverse Complement |
| 6    | ELF2  | 2.56e-04 | 1.64e-01 | 5.43e-02 | 6       | 6      | Reverse Complement |
| 7    | ELF1  | 3.96e-04 | 2.54e-01 | 7.18e-02 | 6       | 3      | Reverse Complement |
| 8    | ERG   | 5.63e-04 | 3.61e-01 | 8.93e-02 | 6       | 3      | Reverse Complement |
| 9    | EHF   | 1.15e-03 | 7.35e-01 | 1.62e-01 | 6       | 2      | Reverse Complement |
| 10   | ETV1  | 1.52e-03 | 9.75e-01 | 1.81e-01 | 6       | 10     | Reverse Complement |
| 11   | ETS1  | 1.57e-03 | 1.01e+00 | 1.81e-01 | 6       | 1      | Reverse Complement |
| 12   | FLI1  | 1.88e-03 | 1.21e+00 | 1.99e-01 | 6       | 5      | Reverse Complement |
| 13   | ETS2  | 2.23e-03 | 1.43e+00 | 2.03e-01 | 6       | 3      | Reverse Complement |
| 14   | STAT3 | 2.23e-03 | 1.43e+00 | 2.03e-01 | 6       | 0      | Reverse Complement |
| 15   | ETV4  | 2.42e-03 | 1.55e+00 | 2.05e-01 | 6       | 1      | Reverse Complement |
| 16   | ELK3  | 3.70e-03 | 2.37e+00 | 2.94e-01 | 6       | 3      | Reverse Complement |
| 17   | SPIB  | 4.26e-03 | 2.73e+00 | 3.04e-01 | 6       | 0      | Reverse Complement |
| 18   | SPDEF | 4.32e-03 | 2.77e+00 | 3.04e-01 | 6       | 4      | Reverse Complement |
| 19   | ETV5  | 4.87e-03 | 3.12e+00 | 3.22e-01 | 6       | 4      | Reverse Complement |
| 20   | STAT4 | 5.08e-03 | 3.26e+00 | 3.22e-01 | 6       | 0      | Reverse Complement |
| 21   | ELF5  | 9.79e-03 | 6.28e+00 | 5.92e-01 | 6       | 2      | Reverse Complement |
| 22   | ETV7  | 1.17e-02 | 7.52e+00 | 6.77e-01 | 6       | 6      | Reverse Complement |

**Supplementary Table 6 | Transcription factor motifs matching CTTCCG.** Motif search in the JASPAR database using the tool TOMTOM<sup>11</sup>. The motif CTTCCG was compared with motifs in the databases for human transcription factors (HOCOMOCOv10).

| Sample                                               | XPC1    | XPC2   | XPC3   | XPC4   | XPC5   | Total mut. freq. <sup>a</sup> | TCGA SKCM mut. freq. <sup>b</sup> |
|------------------------------------------------------|---------|--------|--------|--------|--------|-------------------------------|-----------------------------------|
| RPL13A<br>chr19:49990694 <sup>c</sup>                | -       | -      | -      | -      | -      | 0                             | 0.29                              |
| C16orf59<br>chr16:2510095                            | 0.57    | -      | 0.62   | -      | -      | 0.4                           | 0.18                              |
| ASXL2<br>chr2:26101489                               | -       | -      | -      | -      | 0.6    | 0.2                           | 0.13                              |
| PDCD11<br>chr10:105156316                            | -       | (0.14) | -      | -      | -      | 0                             | 0.13                              |
| FTH1<br>chr11:61735192                               | -       | -      | -      | -      | 0.75   | 0.2                           | 0.13                              |
| FTH1<br>chr11:61735191                               | -       | -      | -      | -      | -      | 0                             | 0.13                              |
| FUBP3<br>chr9:133454938                              | -       | -      | -      | -      | -      | 0                             | 0.13                              |
| ALYREF<br>chr17:79849513                             | -       | -      | -      | -      | -      | 0                             | 0.13                              |
| RNF185<br>chr22:31556121                             | -       | -      | -      | -      | -      | 0                             | 0.13                              |
| MRPS31<br>chr13:41345346                             | -       | -      | (0.19) | -      | -      | 0                             | 0.13                              |
| DPH3 chr3:16306505                                   | -       | 0.64   | -      | -      | -      | 0.2                           | 0.13                              |
| RPL18A<br>chr19:17970682                             | -       | -      | -      | -      | -      | 0                             | 0.13                              |
| C16orf59<br>chr16:2510096                            | 0.69    | -      | 0.57   | -      | -      | 0.4                           | 0.13                              |
| DERL1<br>chr8:124054557                              | -       | -      | -      | -      | -      | 0                             | 0.13                              |
| MASTL<br>chr10:27443328                              | -       | 0.45   | -      | -      | -      | 0.2                           | 0.11                              |
| DIXDC1<br>chr11:111797698                            | -       | -      | -      | -      | -      | 0                             | 0.11                              |
| SMUG1<br>chr12:54582890                              | -       | -      | -      | -      | -      | 0                             | 0.11                              |
| SMUG1<br>chr12:54582889                              | -       | -      | -      | -      | -      | 0                             | 0.11                              |
| CDC20<br>chr1:43824529                               | -       | -      | -      | -      | -      | 0                             | 0.11                              |
| SECISBP2<br>chr9:91933357                            | -       | -      | -      | -      | -      | 0                             | 0.11                              |
| ARHGEF18<br>chr19:7459940                            | -       | -      | -      | 0.8    | -      | 0.2                           | 0.11                              |
| ARHGEF18<br>chr19:7459941                            | -       | -      | -      | -      | -      | 0                             | 0.11                              |
| WDR82<br>chr3:52322052                               | (0.024) | -      | -      | -      | -      | 0                             | 0.11                              |
| SYNJ1<br>chr21:34100374                              | -       | -      | -      | -      | -      | 0                             | 0.11                              |
| POLR2D<br>chr2:128615744                             | -       | -      | -      | -      | -      | 0                             | 0.11                              |
| DHX16<br>chr6:30640796                               | -       | -      | -      | -      | -      | 0                             | 0.11                              |
| MAPIS<br>chr19:17830242                              | -       | -      | -      | -      | -      | 0                             | 0.11                              |
| PRKAG1<br>chr12:49412648                             | 0.6     | -      | -      | -      | -      | 0.2                           | 0.11                              |
| Total no. of mutations <sup>c</sup>                  | 260487  | 300932 | 407399 | 708800 | 757189 |                               |                                   |
| Total no. of promoter hotspot mutations <sup>d</sup> | 3       | 2      | 2      | 1      | 2      |                               |                                   |
| NOTCH1 <sup>c</sup>                                  | 3       | 6      | 1      | 1      | 1      |                               |                                   |
| NOTCH2                                               | 2       | 5      | 1      | 2      | 3      |                               |                                   |
| CDKN2A                                               | 3       | 1      | 0      | 0      | 2      |                               |                                   |
| TP53                                                 | 6       | 6      | 3      | 2      | 0      |                               |                                   |
| Total no. of driver mutations                        | 14      | 18     | 5      | 5      | 6      |                               |                                   |

**Supplementary Table 7 | Mutations in promoter hotspots and driver genes in cSCC tumors with NER deficiency.** Melanoma promoter hotspot positions were investigated in whole genome sequencing data from cSCC tumors from 5 patients with germline NER DNA repair deficiency due to germline homozygous frameshift mutations (C<sub>940</sub>del-1) in the *XPC* gene<sup>3</sup>. In cases where mutations are present, the variant allele frequency is shown for each individual sample (columns) and site (rows), with variant frequencies below 0.2 given within parentheses. <sup>a</sup>Mutation frequency across the 8 tumors, only considering mutations with a variant frequency of at least 0.2. <sup>b</sup>Mutation frequency across the 38 TCGA melanoma tumors.

<sup>c</sup>Total number of called mutations as reported by Zheng *et al.* <sup>3</sup>. <sup>d</sup>Number of promoter hotspot mutations with variant frequency of at least 0.2. <sup>e</sup>Number of non-synonymous mutations in SCC driver genes with a variant frequency of at least 0.2. Non-synonymous mutations that were considered deleterious by PROVEAN<sup>6</sup> or damaging by SIFT<sup>7</sup> were counted as driver mutations.



| Gene                           | Position                                                                        | Forward primer 5' - 3' | Reverse primer 5' - 3' | Amplicon length |
|--------------------------------|---------------------------------------------------------------------------------|------------------------|------------------------|-----------------|
| RPL13A                         | chr19:49990642-49990705                                                         | CCCACGTGATCTCTCGCC     | GCCCTCTTCCGAATGTCCAA   | 83              |
| DPH3                           | chr3:16306469-16306523                                                          | TCGGCATCATCAGGTCGC     | GGGCGGAGTTGCGTCA       | 70              |
| Universal fwd primer           | GGACACTCTTTCCCTACACGACGCTCTTCCGATCTNNNNNNNNNNATGGGAAAGAGTGTCC-fwd target primer |                        |                        |                 |
| Universal Rev primer           | GTGACTGGAGTTCAGACGTGTGCTCTTCCGATCT-rev target primer                            |                        |                        |                 |
| Illumina fwd primer            | AATGATACGGCGACCACCGAGATCTACACTCTTTCCCTACACGACGCTCTTCCGATCT                      |                        |                        |                 |
| Illumina rev primer with index | CAAGCAGAAGACGGCATACGAGATNNNNNNGTGAAGTTCAGACGTGTGCTCTTCCGATCT                    |                        |                        |                 |
| Index primer                   | GATCGGAAGAGCACACGTCTGAACTCCAGTCAC                                               |                        |                        |                 |
| Sequencing primer              | ACACTCTTTCCCTACACGACGCTCTTCCGATCT                                               |                        |                        |                 |

**Supplementary Table 8 | PCR and adapter primer sequences used for SiMSen ultrasensitive amplicon sequencing.**

## Supplementary references

1. Durinck, S. *et al.* Temporal Dissection of Tumorigenesis in Primary Cancers. *Cancer Discovery* **1**, 137-143 (2011).
2. Martincorena, I. *et al.* High burden and pervasive positive selection of somatic mutations in normal human skin. *Science* **348**, 880-886 (2015).
3. Zheng, Christina L. *et al.* Transcription Restores DNA Repair to Heterochromatin, Determining Regional Mutation Rates in Cancer Genomes. *Cell Reports* **9**, 1228-1234 (2014).
4. Berger, M.F. *et al.* Melanoma genome sequencing reveals frequent PREX2 mutations. *Nature* **485**, 502-506 (2012).
5. Fredriksson, N.J., Ny, L., Nilsson, J.A. & Larsson, E. Systematic analysis of noncoding somatic mutations and gene expression alterations across 14 tumor types. *Nat Genet* **46**, 1258-63 (2014).
6. Choi, Y., Sims, G.E., Murphy, S., Miller, J.R. & Chan, A.P. Predicting the Functional Effect of Amino Acid Substitutions and Indels. *PLoS ONE* **7**, e46688 (2012).
7. Kumar, P., Henikoff, S. & Ng, P.C. Predicting the effects of coding non-synonymous variants on protein function using the SIFT algorithm. *Nat. Protocols* **4**, 1073-1081 (2009).
8. Fredriksson, N.J., Ny, L., Nilsson, J.A. & Larsson, E. Systematic analysis of noncoding somatic mutations and gene expression alterations across 14 tumor types. *Nature genetics* **46**, 1258-63 (2014).
9. Alexandrov, L. *et al.* Signatures of mutational processes in human cancer. *Nature* **500**, 415 - 421 (2013).
10. Denisova, E. *et al.* Frequent DPH3 promoter mutations in skin cancers. *Oncotarget* (2015).
11. Jolma, A. *et al.* DNA-Binding Specificities of Human Transcription Factors. *Cell* **152**, 327-339 (2013).
